# Supplementary material for: Palladium-catalyzed cascade cyclization of allenamide with 2-iodoanilines to access functionalized indoloquinolines
Source: Royal Society of Chemistry journal article supplement (doi:10.1039/d2ob01770a), 2022-11-28

## Supporting Information

### **Palladium-Catalyzed Cascade Cyclization of Allenamide with 2-Iodoaniline to Access Functionalized Indoloquinolines**

Wenzhe Geng,<sup>§,a</sup> Hui Wang,<sup>§,a,b</sup> Juan Xi, Ruonan Jiang, Jintao Guo, Keqiang Jiao, Mengyao Tang,  
Qing Liu<sup>\*a</sup>, Lizhi Zhang<sup>\*a</sup> and Hui Liu<sup>\*,a,b</sup>

School of Chemical Engineering, Shandong University of Technology, 266 West Xincun  
Road, Zibo, 255049, P. R. China

\*E-mail: [hui Liu1030@sdut.edu.cn](mailto:hui Liu1030@sdut.edu.cn)

## Table of Contents

|                                                                       |    |
|-----------------------------------------------------------------------|----|
| 1. General Information                                                | 3  |
| 2. Preparation of Starting Material                                   | 4  |
| 3. Optimization of Reaction Conditions                                | 13 |
| 4. Typical Procedure and Analytical Data                              | 16 |
| 5. Copies of the $^1\text{H}$ NMR and $^{13}\text{C}$ NMR for Product | 29 |

## 1. General Information

Organic solvents (Aldrich) were used without further purification. Purifications of reactions products were carried out by flash chromatography using Merck silica gel (40-63  $\mu\text{m}$ ).  $^1\text{H}$  NMR (400 MHz),  $^{13}\text{C}$  NMR (100 MHz) were measured on a Bruker Avance 400 MHz spectrometer. Chemical shifts are reported in parts per million (ppm,  $\delta$ ) downfield from residual solvents peaks and coupling constants are reported as Hertz (Hz). Splitting patterns are designated as singlet (s), doublet (d), triplet (t), .... Splitting patterns that could not be interpreted or easily visualized are designated as multiplet (m). Electrospray mass spectra were obtained using an ESI/TOF Mariner Mass Spectrometer. Unless otherwise noted, all other commercially available reagents and solvents were used without further purification.

## 2. Preparation of Starting Material.

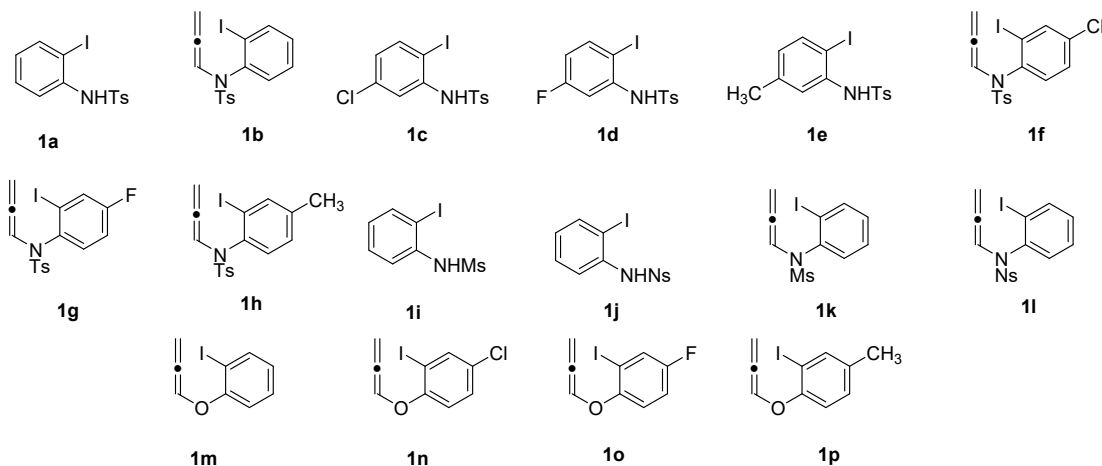

### General Procedure I:

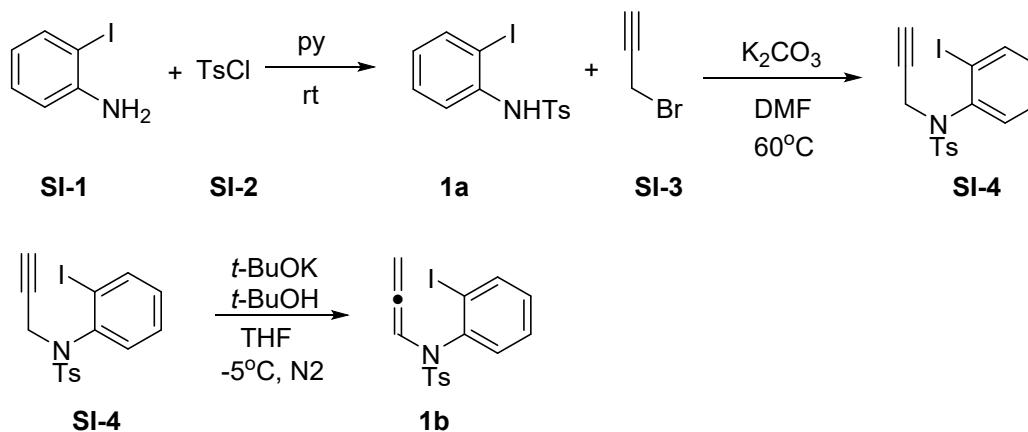

**Preparation of alcohol 1a:** To a solution of o-iodoaniline (2.2 g, 10.0 mmol, 1.0 equiv) in pyridine (10.0 mL) was added TsCl (2.1 g, 10.5 mmol, 1.05 equiv) at room temperature. The reaction was stirred at room temperature for 8 h before being quenched with H<sub>2</sub>O. The quenched mixture was extracted three times with DCM. The combined organic phase was first washed with 1.0 M HCl to remove excess pyridine, and then washed with saturated aqueous NaHCO<sub>3</sub>, H<sub>2</sub>O, brine, and dried over Na<sub>2</sub>SO<sub>4</sub>. The filtrate was concentrated under reduced pressure and crude tosylation product was afforded without further purification.

**Preparation of alcohol SI-4:** To a solution of the crude tosylation product in DMF (20.0 mL), potassium carbonate (2.1 g, 15.0 mmol, 1.5 equiv) and 3-bromopropyne (1.8 g, 15.0 mmol, 1.5 equiv) was added. The mixture stirred in an oil bath at 60 °C for 8 h. After the reaction was complete, the filtrate was concentrated under reduced pressure and purified by flash column chromatography to give the propargyl amide **SI-4**.

**Preparation of alcohol 1b:** Dissolve the **SI-4** in t-BuOH, then inject THF (10 mL) into the solution, after that, the solution was added t-BuOK (0.34 g, 3.0 mmol, 0.3 equiv) at 0 °C. The reaction was stirred at -5°C for 1 h before being concentrated under reduced pressure. Subsequently, the residue was suspended in DCM. The filtrate was concentrated under reduced pressure and the crude residue was purified by flash column chromatography to give the allenamide **1b**.

**Analytical Data:**

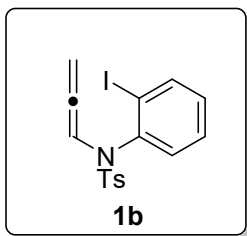

***N*-(2-iodophenyl)-4-methyl-*N*-(propa-1,2-dien-1-yl)benzenesulfonamide(1b)**

C<sub>16</sub>H<sub>14</sub>INO<sub>2</sub>S

The title compound was prepared according to **general procedure I**.

**<sup>1</sup>H NMR (400 MHz, CDCl<sub>3</sub>, δ ppm):** 2.45 (s, 3H), 5.00 (dd, *J* = 18.0, 6.0 Hz, 2H), 6.76 (dd, *J* = 8.0, 1.6 Hz, 1H), 7.02 (td, *J* = 8.0, 1.6 Hz, 1H), 7.09 (t, *J* = 6.4 Hz, 1H), 7.22 (td, *J* = 8.0, 1.6 Hz, 1H), 7.32 (d, *J* = 8.0 Hz, 1H), 7.68 (dd, *J* = 6.4, 1.6 Hz, 2H), 7.89 (dd, *J* = 8.0, 1.6 Hz, 1H).

**<sup>13</sup>C NMR (100 MHz, CDCl<sub>3</sub>, δ ppm):** 21.9, 87.9, 102.2, 128.2, 128.8, 130.0, 130.4, 130.5, 136.3, 140.2, 140.5, 144.4, 201.5.

.....  
.....

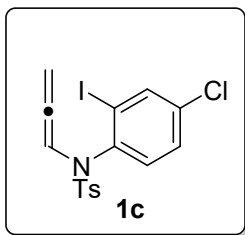

***N*-(4-chloro-2-iodophenyl)-4-methyl-*N*-(propa-1,2-dien-1-yl)benzenesulfonamide(1c)**

C<sub>16</sub>H<sub>13</sub>ClINO<sub>2</sub>S

The title compound was prepared according to **general procedure I**.

**<sup>1</sup>H NMR (400 MHz, CDCl<sub>3</sub>, δ ppm):** 2.46 (s, 3H), 5.04(dd, *J* = 19.6, 6.4 Hz, 2H), 6.80 (d, *J* = 8.4 Hz, 1H), 7.07 (t, *J* = 6.0 Hz, 1H), 7.20 (dd, *J* = 8.4, 2.4 Hz, 1H), 7.33 (d, *J* = 8.4 Hz, 2H), 7.67 (dd, *J* = 6.4, 2.0 Hz, 2H), 7.88 (d, *J* = 2.4 Hz, 1H).

**<sup>13</sup>C NMR (100 MHz, CDCl<sub>3</sub>, δ ppm):** 21.9, 88.3, 102.0, 102.5, 128.2, 129.1, 130.1, 130.9, 135.5, 136.0, 138.9, 140.0, 144.7, 201.3.

.....

.....

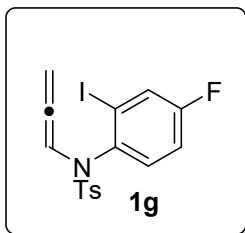

***N*-(4-fluoro-2-iodophenyl)-4-methyl-*N*-(propa-1,2-dien-1-yl)benzenesulfonamide(1g)**

C<sub>16</sub>H<sub>13</sub>FINO<sub>2</sub>S

The title compound was prepared according to **general procedure I**.

**<sup>1</sup>H NMR (400 MHz, CDCl<sub>3</sub>, δ ppm):** 2.17 (s, 3H), 2.46 (s, 3H), 5.04(dd, *J* = 19.2, 6.0 Hz, 2H), 6.62 (d, *J* = 8.4 Hz, 1H), 7.06 (t, *J* = 6.4 Hz, 1H), 7.34 (m, 3H), 7.66 (dd, *J* = 6.8, 1.6 Hz, 2H), 8.03 (d, *J* = 2.0 Hz, 1H).

**<sup>13</sup>C NMR (100 MHz, CDCl<sub>3</sub>, δ ppm):** 21.9, 88.4, 102.0, 103.0, 123.6, 128.2, 130.1, 131.4, 132.1, 136.0, 139.4, 142.7, 144.7, 201.3.

.....

.....

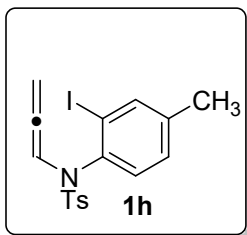

***N*-(2-iodo-4-methylphenyl)-4-methyl-*N*-(propa-1,2-dien-1-yl)benzenesulfonamide(1h)**

C<sub>17</sub>H<sub>16</sub>INO<sub>2</sub>S

The title compound was prepared according to **general procedure I**.

**<sup>1</sup>H NMR (400 MHz, CDCl<sub>3</sub>, δ ppm):** 2.46 (s, 3H), 2.49(s,3H),5.04(dd, *J* = 19.2, 6.0 Hz, 2H), 6.62 (d, *J* = 8.4 Hz, 1H), 7.06 (t, *J* = 6.4 Hz, 1H), 7.34 (m, 3H), 7.66 (dd, *J* = 6.8, 1.6 Hz, 2H), 8.03 (d, *J* = 2.0 Hz, 1H).

**<sup>13</sup>C NMR (100 MHz, CDCl<sub>3</sub>, δ ppm):** 21.6, 21.9, 88.4, 102.0, 103.0,123.6, 128.2, 130.1, 131.4, 132.1, 136.0, 139.4, 142.7, 144.7, 201.3.

**General Procedure II:**

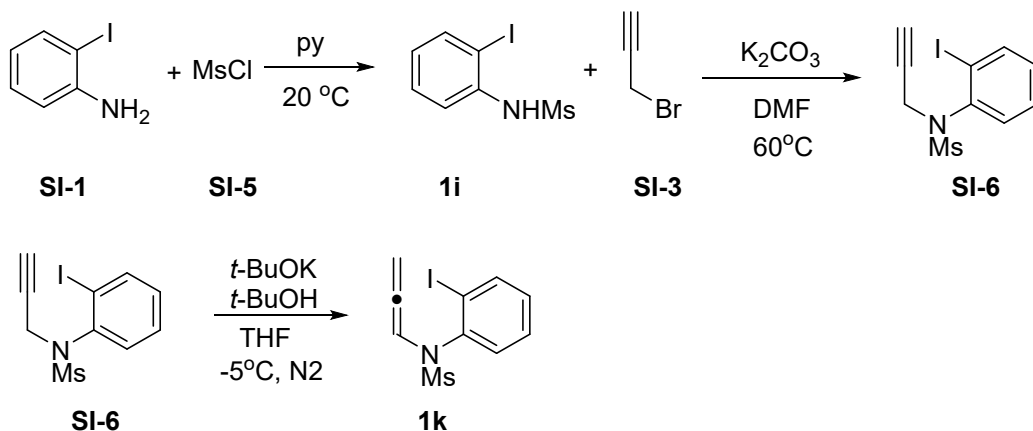

**Preparation of alcohol 1i:** To a solution of *o*-iodoaniline (2.2 g, 10.0 mmol, 1.0 equiv) in pyridine (10.0 mL) was added MsCl (1.72 g, 15 mmol, 1.5 equiv) at 20 °C. The reaction was stirred at room temperature for 5h before being quenched with H<sub>2</sub>O. The quenched mixture was extracted three times with DCM. The combined organic phase was first washed with 1.0 M HCl to remove excess pyridine, and then washed with saturated aqueous NaHCO<sub>3</sub>, H<sub>2</sub>O, brine, and dried over Na<sub>2</sub>SO<sub>4</sub>. The filtrate was concentrated under reduced pressure and crude tosylation product was afforded without further purification.

**Preparation of alcohol SI-4:** To a solution of the crude tosylation product in DMF (20.0 mL), potassium carbonate (2.1 g, 15.0 mmol, 1.5 equiv) and 3-bromopropyne (1.8 g, 15.0

mmol, 1.5 equiv) was added. The mixture stirred in an oil bath at 60 °C for 8 h. After the reaction was complete, the filtrate was concentrated under reduced pressure and purified by flash column chromatography to give the propargyl amide **SI-4**.

**Preparation of alcohol 1k:** Dissolve the **SI-6** in t-BuOH, then inject THF (10 mL) into the solution, after that, the solution was added t-BuOK (0.34 g, 3.0 mmol, 0.3 equiv) at 0 °C. The reaction was stirred at -5°C for 1 h before being concentrated under reduced pressure. Subsequently, the residue was suspended in DCM. The filtrate was concentrated under reduced pressure and the crude residue was purified by flash column chromatography to give the allenamide **1k**.

**Analytical Data:**

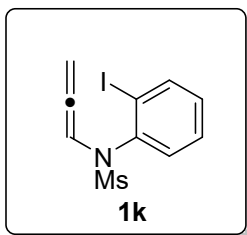

***N*-(2-iodophenyl)-*N*-(propa-1,2-dien-1-yl)methanesulfonamide(**1k**)**

C<sub>10</sub>H<sub>10</sub>INO<sub>2</sub>S

**<sup>1</sup>H NMR (400 MHz, CDCl<sub>3</sub>, δ ppm):** 2.45 (s, 3H), 5.00 (dd, *J* = 18.0, 6.0 Hz, 2H), 7.22 (td, *J* = 8.0, 1.6 Hz, 1H), 7.32 (d, *J* = 8.0 Hz, 1H), 7.68 (dd, *J* = 6.4, 1.6 Hz, 2H), 7.89 (dd, *J* = 8.0, 1.6 Hz, 1H).

**<sup>13</sup>C NMR (100 MHz, CDCl<sub>3</sub>, δ ppm):** 21.9, 87.9, 102.2, 128.2, 130.0, 130.5, 136.3, 140.2, 144.4, 201.5.

**General Procedure III:**



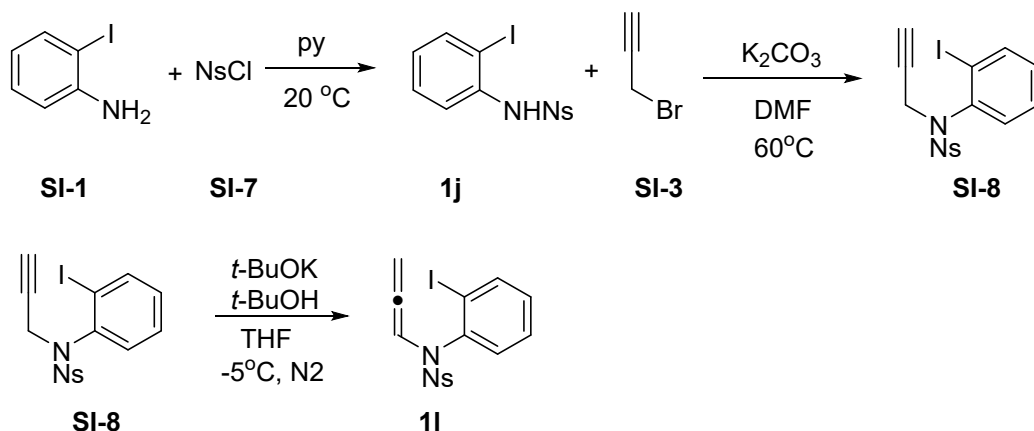

**Preparation of alcohol 1j:** To a solution of o-iodoaniline (2.2 g, 10.0 mmol, 1.0 equiv) in pyridine (10.0 mL) was added NsCl (2.44 g, 11 mmol, 1.1 equiv) at 20 °C. The reaction was stirred at room temperature for 5h before being quenched with H<sub>2</sub>O. The quenched mixture was extracted three times with DCM. The combined organic phase was first washed with 1.0 M HCl to remove excess pyridine, and then washed with saturated aqueous NaHCO<sub>3</sub>, H<sub>2</sub>O, brine, and dried over Na<sub>2</sub>SO<sub>4</sub>. The filtrate was concentrated under reduced pressure and crude tosylation product was afforded without further purification.

**Preparation of alcohol SI-8:** To a solution of the crude tosylation product in DMF (20.0 mL), potassium carbonate (2.1 g, 15.0 mmol, 1.5 equiv) and 3-bromopropyne (1.8 g, 15.0 mmol, 1.5 equiv) was added. The mixture stirred in an oil bath at 60 °C for 8 h. After the reaction was complete, the filtrate was concentrated under reduced pressure and purified by flash column chromatography to give the propargyl amide **SI-8**.

**Preparation of alcohol 11:** Dissolve the **SI-8** in t-BuOH, then inject THF (10 mL) into the solution, after that, the solution was added t-BuOK (0.34 g, 3.0 mmol, 0.3 equiv) at 0 °C. The reaction was stirred at -5°C for 1 h before being concentrated under reduced pressure. Subsequently, the residue was suspended in DCM. The filtrate was concentrated under reduced pressure and the crude residue was purified by flash column chromatography to give the allenamide **11**.

**Analytical Data:**

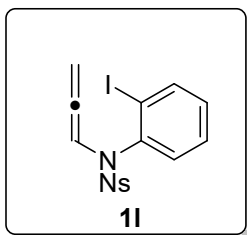

***N*-(2-iodophenyl)-4-nitro-*N*-(propa-1,2-dien-1-yl)benzenesulfonamide(1l)**

C<sub>15</sub>H<sub>11</sub>IN<sub>2</sub>O<sub>4</sub>S

**<sup>1</sup>H NMR (400 MHz, CDCl<sub>3</sub>, δ ppm):** 5.00 (dd, *J* = 18.0, 6.0 Hz, 2H), 6.76 (dd, *J* = 8.0, 1.6 Hz, 1H), 7.02 (td, *J* = 8.0, 1.6 Hz, 1H), 7.09 (t, *J* = 6.4 Hz, 1H), 7.22 (td, *J* = 8.0, 1.6 Hz, 1H), 7.32 (d, *J* = 8.0 Hz, 1H), 7.68 (dd, *J* = 6.4, 1.6 Hz, 2H), 7.89 (dd, *J* = 8.0, 1.6 Hz, 1H).

**<sup>13</sup>C NMR (100 MHz, CDCl<sub>3</sub>, δ ppm):** 21.9, 87.9, 102.2, 128.2, 128.8, 130.0, 130.4, 130.5, 136.3, 140.2, 140.5, 144.4, 201.5.

**General Procedure IV:**

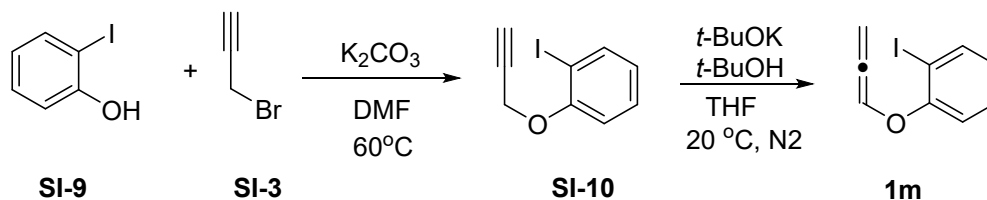

**Preparation of alcohol SI-10:** To a solution of the crude tosylation product in DMF (20.0 mL), potassium carbonate (2.1 g, 15.0 mmol, 1.5 equiv) and 3-bromopropyne (1.8 g, 15.0 mmol, 1.5 equiv) was added. The mixture stirred in an oil bath at 60 °C for 8 h. After the reaction was complete, the filtrate was concentrated under reduced pressure and purified by flash column chromatography to give the propargyl amide **SI-10**.

**Preparation of alcohol 1m:** Dissolve the **SI-10** in *t*-BuOH, then inject THF (10 mL) into the solution, after that, the solution was added *t*-BuOK (0.34 g, 3.0 mmol, 0.3 equiv) at 0 °C. The reaction was stirred at 20°C for 12 h before being concentrated under reduced pressure. Subsequently, the residue was suspended in DCM. The filtrate was concentrated under reduced pressure and the crude residue was purified by flash column chromatography to give the allenamide **1m**.

**Analytical Data:**

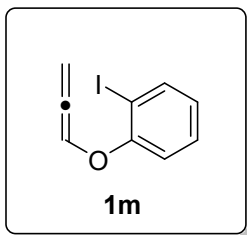

**1-iodo-2-(propa-1,2-dien-1-yloxy)benzene(1m)**

C<sub>9</sub>H<sub>7</sub>IO

**<sup>1</sup>H NMR (400 MHz, CDCl<sub>3</sub>, δ ppm):** 5.00 (dd, *J* = 18.0, 6.0 Hz, 2H), 7.22 (td, *J* = 8.0, 1.6 Hz, 1H), 7.32 (d, *J* = 8.0 Hz, 1H), 7.68 (dd, *J* = 6.4, 1.6 Hz, 2H), 7.79 (d, *J* = 8.1 Hz, 1H).

**<sup>13</sup>C NMR (100 MHz, CDCl<sub>3</sub>, δ ppm):** 87.2, 90.4, 116.8, 118.4, 124.7, 129.3, 139.6, 156.2, 202.4.

.....

.....

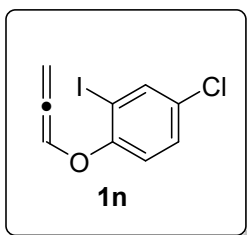

**4-chloro-2-iodo-1-(propa-1,2-dien-1-yloxy)benzene(1n)**

C<sub>9</sub>H<sub>6</sub>ClIO

The title compound was prepared according to **general procedure IV**.

**<sup>1</sup>H NMR (400 MHz, CDCl<sub>3</sub>, δ ppm):** 5.00 (dd, *J* = 18.0, 6.0 Hz, 2H), 6.80 (d, *J* = 8.4 Hz, 1H), 7.07 (t, *J* = 6.0 Hz, 1H), 7.20 (dd, *J* = 8.4, 2.4 Hz, 1H), 7.79 (d, *J* = 8.1 Hz, 1H).

**<sup>13</sup>C NMR (100 MHz, CDCl<sub>3</sub>, δ ppm):** 87.2, 90.4, 116.8, 118.4, 124.7, 129.3, 139.6, 156.2, 202.4.

.....

.....

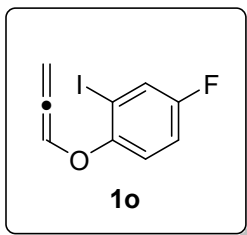

**4-fluoro-2-iodo-1-(propa-1,2-dien-1-yloxy)benzene(1o)**

C<sub>9</sub>H<sub>6</sub>FIO

The title compound was prepared according to **general procedure IV**.

**<sup>1</sup>H NMR (400 MHz, CDCl<sub>3</sub>, δ ppm):** 5.00 (dd, *J* = 18.0, 6.0 Hz, 2H), 6.80 (d, *J* = 8.4 Hz, 1H), 7.07 (t, *J* = 6.0 Hz, 1H), 7.20 (dd, *J* = 8.4, 2.4 Hz, 1H), 7.79 (d, *J* = 8.1 Hz, 1H).

**<sup>13</sup>C NMR (100 MHz, CDCl<sub>3</sub>, δ ppm):** 87.2, 90.4, 116.8, 118.4, 124.7, 129.3, 139.6, 156.2, 202.4.

.....

.....

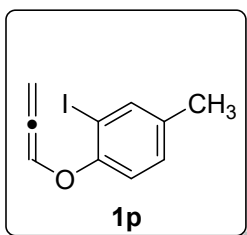

**2-iodo-4-methyl-1-(propa-1,2-dien-1-yloxy)benzene(1p)**

C<sub>10</sub>H<sub>9</sub>IO

The title compound was prepared according to **general procedure IV**.

**<sup>1</sup>H NMR (400 MHz, CDCl<sub>3</sub>, δ ppm):** 2.49(s, 3H), 5.00 (dd, *J* = 18.0, 6.0 Hz, 2H), 6.80 (d, *J* = 8.4 Hz, 1H), 7.07 (t, *J* = 6.0 Hz, 1H), 7.20 (dd, *J* = 8.4, 2.4 Hz, 1H), 7.79 (d, *J* = 8.1 Hz, 1H).

**<sup>13</sup>C NMR (100 MHz, CDCl<sub>3</sub>, δ ppm):** 87.2, 90.4, 116.8, 118.4, 124.7, 129.3, 139.6, 156.2, 202.4.

### 3. Optimization of Reaction Conditions

Table 1.

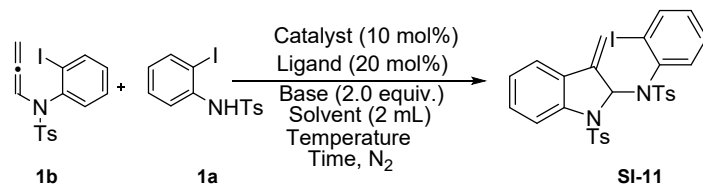

| Entry | Catalyst                           | Ligand           | Base                            | Solvent | Temperature (°C) | Time (h) | Yield (%) |
|-------|------------------------------------|------------------|---------------------------------|---------|------------------|----------|-----------|
| 1     | Pd(PPh <sub>3</sub> ) <sub>4</sub> | -                | K <sub>2</sub> CO <sub>3</sub>  | MeCN    | 80               | 4        | 60        |
| 2     | Pd(PPh <sub>3</sub> ) <sub>4</sub> | -                | Cs <sub>2</sub> CO <sub>3</sub> | MeCN    | 80               | 4        | 52        |
| 3     | Pd(PPh <sub>3</sub> ) <sub>4</sub> | -                | Na <sub>2</sub> CO <sub>3</sub> | MeCN    | 80               | 4        | 50        |
| 4     | Pd(PPh <sub>3</sub> ) <sub>4</sub> | -                | KF                              | MeCN    | 80               | 4        | 52        |
| 5     | Pd(PPh <sub>3</sub> ) <sub>4</sub> | -                | CsF                             | MeCN    | 80               | 4        | 56        |
| 6     | Pd(dba) <sub>2</sub>               | PPh <sub>3</sub> | Cs <sub>2</sub> CO <sub>3</sub> | MeCN    | 80               | 4        | 63        |
| 7     | Pd <sub>2</sub> (dba) <sub>3</sub> | PPh <sub>3</sub> | Cs <sub>2</sub> CO <sub>3</sub> | MeCN    | 80               | 4        | 62        |
| 8     | Pd(OAc) <sub>2</sub>               | PPh <sub>3</sub> | Cs <sub>2</sub> CO <sub>3</sub> | MeCN    | 80               | 4        | -         |
| 9     | PdCl <sub>2</sub> (dppf)           | -                | Cs <sub>2</sub> CO <sub>3</sub> | MeCN    | 80               | 4        | -         |
| 10    | Pd(dba) <sub>2</sub>               | PCy <sub>3</sub> | Cs <sub>2</sub> CO <sub>3</sub> | MeCN    | 80               | 4        | 64        |
| 11    | Pd <sub>2</sub> (dba) <sub>3</sub> | PCy <sub>3</sub> | Cs <sub>2</sub> CO <sub>3</sub> | MeCN    | 80               | 4        | 60        |
| 12    | Pd(PPh <sub>3</sub> ) <sub>4</sub> | -                | Cs <sub>2</sub> CO <sub>3</sub> | MeCN    | 100              | 4        | 65        |
| 13    | Pd(PPh <sub>3</sub> ) <sub>4</sub> | -                | Cs <sub>2</sub> CO <sub>3</sub> | MeCN    | 120              | 4        | 55        |
| 14    | Pd(PPh <sub>3</sub> ) <sub>4</sub> | -                | Cs <sub>2</sub> CO <sub>3</sub> | toluene | 80               | 4        | 54        |
| 15    | Pd(PPh <sub>3</sub> ) <sub>4</sub> | -                | Cs <sub>2</sub> CO <sub>3</sub> | DMF     | 80               | 4        | -         |
| 16    | Pd(PPh <sub>3</sub> ) <sub>4</sub> | -                | Cs <sub>2</sub> CO <sub>3</sub> | dioxane | 80               | 4        | 55        |

We embarked on our studies by screening the reaction parameters of the coupling of N-(2-iodophenyl)-4-methyl-N-(propa-1,2-dien-1-yl)benzenesulfonamide **1b** with N-(2-iodophenyl)-4-methylbenzenesulfonamide **1a** in the presence of 10 mol% Pd(PPh<sub>3</sub>)<sub>4</sub> and 2.0 equiv. of K<sub>2</sub>CO<sub>3</sub> at 80 °C in MeCN under N<sub>2</sub>. In this condition, we get intermediate product **SI-11** and product **3a** through the one-pot method. After that, we try to make a complete conversion of product **SI-11** to **3a**. Therefore, we started experimenting with different reaction conditions to improve the reaction efficiency. First of all, it is also critical to increase the yield of intermediate **3a**. Then we used ingredients 1a and 1b in the presence of 10 mol% Pd(PPh<sub>3</sub>)<sub>4</sub> and 2.0 equiv. of K<sub>2</sub>CO<sub>3</sub> at 80 °C in MeCN under N<sub>2</sub>. In this condition, the intermediate **SI-11** was isolated in 60% yield (entry 1). Base on this, some bases such as Cs<sub>2</sub>CO<sub>3</sub>, Na<sub>2</sub>CO<sub>3</sub>, KF and CsF were investigated, which obtained better results (entries 2-5). Then we tried different kinds of catalysts and ligands. Unfortunately,

all of the conditions did not improve the transformation entries (6-11). Furthermore, we tried different reaction temperatures, but increasing the reaction temperature does not increase the efficiency of the reaction (entries 12-13). Different solvents were screened, such as toluene, DMF, and dioxane (entries 14-16), but MeCN still was the best choice. Based on the above results, Pd(PPh<sub>3</sub>)<sub>4</sub> (10 mol%) and Cs<sub>2</sub>CO<sub>3</sub> (2.0 equiv.) in MeCN at 80°C for 4h were chosen as the optimized conditions. For more reaction conditions, see table 1.

Table 2

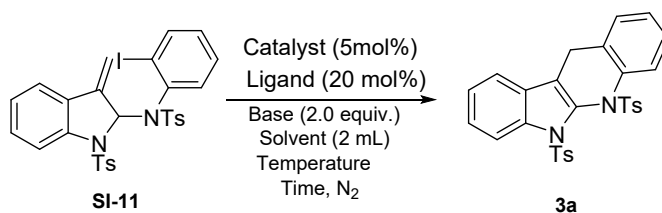

| Entry | Catalyst                           | Ligand           | Base                            | Solvent | Temperature (°C) | Time (h) | Yield (%) |
|-------|------------------------------------|------------------|---------------------------------|---------|------------------|----------|-----------|
| 1     | Pd(PPh <sub>3</sub> ) <sub>4</sub> | -                | K <sub>2</sub> CO <sub>3</sub>  | MeCN    | 80               | 4        | 82        |
| 2     | Pd(PPh <sub>3</sub> ) <sub>4</sub> | -                | Cs <sub>2</sub> CO <sub>3</sub> | MeCN    | 80               | 4        | 92        |
| 3     | Pd(PPh <sub>3</sub> ) <sub>4</sub> | -                | Na <sub>2</sub> CO <sub>3</sub> | MeCN    | 80               | 4        | 88        |
| 4     | Pd(PPh <sub>3</sub> ) <sub>4</sub> | -                | KF                              | MeCN    | 80               | 4        | 82        |
| 5     | Pd(PPh <sub>3</sub> ) <sub>4</sub> | -                | CsF                             | MeCN    | 80               | 4        | 76        |
| 6     | Pd(PPh <sub>3</sub> ) <sub>4</sub> | -                | Et <sub>3</sub> N               | MeCN    | 80               | 4        | -         |
| 7     | Pd(PPh <sub>3</sub> ) <sub>4</sub> | -                | Cs <sub>2</sub> CO <sub>3</sub> | MeCN    | 100              | 4        | 83        |
| 8     | Pd(PPh <sub>3</sub> ) <sub>4</sub> | -                | Cs <sub>2</sub> CO <sub>3</sub> | MeCN    | 120              | 4        | 83        |
| 9     | Pd(PPh <sub>3</sub> ) <sub>4</sub> | -                | Cs <sub>2</sub> CO <sub>3</sub> | toluene | 100              | 4        | 74        |
| 10    | Pd(PPh <sub>3</sub> ) <sub>4</sub> | -                | Cs <sub>2</sub> CO <sub>3</sub> | dioxane | 100              | 4        | 65        |
| 11    | Pd(dba) <sub>2</sub>               | PPh <sub>3</sub> | Cs <sub>2</sub> CO <sub>3</sub> | MeCN    | 80               | 4        | 27        |
| 12    | Pd <sub>2</sub> (dba) <sub>3</sub> | PPh <sub>3</sub> | Cs <sub>2</sub> CO <sub>3</sub> | MeCN    | 80               | 4        | 23        |
| 13    | Pd(OAc) <sub>2</sub>               | PPh <sub>3</sub> | Cs <sub>2</sub> CO <sub>3</sub> | MeCN    | 80               | 4        | -         |
| 14    | PdCl <sub>2</sub> (dppe)           | -                | Cs <sub>2</sub> CO <sub>3</sub> | MeCN    | 80               | 4        | -         |
| 15    | Pd(dba) <sub>2</sub>               | PCy <sub>3</sub> | Cs <sub>2</sub> CO <sub>3</sub> | MeCN    | 80               | 4        | 24        |
| 16    | Pd <sub>2</sub> (dba) <sub>3</sub> | PCy <sub>3</sub> | Cs <sub>2</sub> CO <sub>3</sub> | MeCN    | 80               | 4        | 28        |

We set out to increase the yield of the final product. Firstly, we also use K<sub>2</sub>CO<sub>3</sub> as base, the product **3a** was isolated in 82% yield (entry 1). Refer to the previous reaction results,

and then we use the optimal conditions from the previous step, to our delight, the yield of product **3a** went up to 92% (entry 2). The next, we use different kinds of bases such as  $\text{Na}_2\text{CO}_3$ ,  $\text{KF}$ ,  $\text{CsF}$  and  $\text{Et}_3\text{N}$ , but the structure is not satisfactory to us (entries 3-6). Then we increased the reaction temperature to observe the change of reaction yield, unfortunately, all of the changes did not improve the transformations (entries 7-8). Furthermore, different solvents were screened, such as toluene, and dioxane (entries 9-10), but these two solvents reduce the reaction yield. At last, we screened different kinds of catalysts and ligands, but all the kinds of catalysts and ligands did not work out very well (entries 11-16). Based on the above results,  $\text{Pd}(\text{PPh}_3)_4$  (5 mol%) and  $\text{Cs}_2\text{CO}_3$  (2.0 equiv.) in MeCN at  $80^\circ\text{C}$  for 4h were chosen as the optimized conditions. All the reaction conditions, see table 2.

#### 4. Typical Procedure and Analytical Data

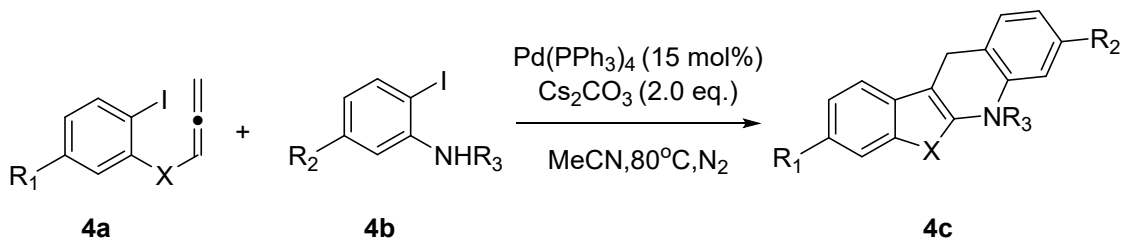

#### Typical Procedure

allenamide derivatives **4a** (0.20 mmol, 1.0 equiv), 2-iodide aniline derivatives **4b**, (0.20 mmol, 1.0 equiv), Pd (PPh<sub>3</sub>)<sub>3</sub> (0.03 mmol, 0.15 equiv), and Cs<sub>2</sub>CO<sub>3</sub> (130.3 mg, 0.40 mmol, 2.0 equiv) were added to a reaction tube and vacuum purged three times, backfilling with N<sub>2</sub>. Then the MeCN (3 mL) was added under nitrogen atmosphere. The resulting mixture was stirred at 80 °C for 4 h. After cooling the reaction mixture at rt, it was quenched with H<sub>2</sub>O. The aqueous layer was extracted with EA (10 mL ×3). The combined organic phase was sequentially washed with saturated aqueous solution of NaCl and then concentrated in vacuo. The mixture was purified by silica gel column chromatography (PE: EA, 5:1) to give product **4c**.

#### Analytical Data:

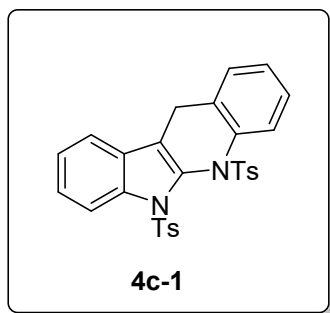

#### 5,6-ditosyl-6,11-dihydro-5H-indolo[2,3-b]quinoline

C<sub>29</sub>H<sub>24</sub>N<sub>2</sub>O<sub>4</sub>S<sub>2</sub>      MW: 528.64 g·mol<sup>-1</sup>

Light yellow solid

**Isolated Amount:** 97.2 mg      **Yield:** 92%.

**<sup>1</sup>H NMR (400 MHz, CDCl<sub>3</sub>, δ ppm):** 7.98 (d, *J* = 7.9 Hz, 1H), 7.69 (d, *J* = 7.1 Hz, 1H), 7.54 (d, *J* = 7.2 Hz, 1H), 7.50 (d, *J* = 7.9 Hz, 2H), 7.44 (d, *J* = 7.8 Hz, 2H), 7.41 (d, *J* = 7.2



Hz, 1H), 7.28 (d,  $J = 9.4$  Hz, 4H), 7.17 (d,  $J = 7.8$  Hz, 2H), 7.02 (d,  $J = 7.8$  Hz, 2H), 4.86 (s, 2H), 2.34 (s, 3H), 2.29 (s, 3H).

**$^{13}\text{C}$  NMR (100 MHz,  $\text{CDCl}_3$ ,  $\delta$  ppm):** 144.8, 143.9, 139.0, 136.2, 135.4, 135.1, 133.5, 129.7, 129.5, 127.9, 127.5, 126.8, 126.6, 126.4, 126.1, 125.6, 124.8, 124.4, 122.7, 118.8, 116.5, 43.4, 21.6, 21.5.

**MS (EI)**  $m/z$  528 (M<sup>+</sup>); **HRMS (ESI)** Calcd for  $\text{C}_{29}\text{H}_{24}\text{N}_2\text{O}_4\text{S}+\text{H}$  529.1256, Found 529.1264.

.....  
.....

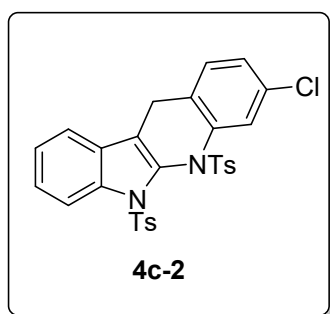

**3-chloro-5,6-ditosyl-6,11-dihydro-5H-indolo[2,3-b]quinoline**

$\text{C}_{29}\text{H}_{23}\text{ClN}_2\text{O}_4\text{S}_2$       **MW:** 563.08 g·mol<sup>-1</sup>

Light yellow solid

**Isolated Amount:** 96.8 mg      **Yield:** 86%.

**$^1\text{H}$  NMR (400 MHz,  $\text{CDCl}_3$ ,  $\delta$  ppm):** 7.93 (d,  $J = 8.8$  Hz, 1H), 7.72 (d,  $J = 7.4$  Hz, 1H), 7.51 (d,  $J = 7.6$  Hz, 1H), 7.47 (d,  $J = 7.6$  Hz, 4H), 7.37 (s, 1H), 7.28 (q,  $J = 8.6, 7.9$  Hz, 3H), 7.18 (d,  $J = 7.7$  Hz, 2H), 7.07 (d,  $J = 7.7$  Hz, 2H), 4.80 (s, 2H), 2.35 (s, 3H), 2.32 (s, 3H).

**$^{13}\text{C}$  NMR (100 MHz,  $\text{CDCl}_3$ ,  $\delta$  ppm):** 144.8, 143.9, 139.0, 136.2, 135.4, 135.1, 133.5, 129.7, 129.5, 127.9, 127.5, 126.8, 126.6, 126.4, 126.1, 125.6, 124.8, 124.4, 122.7, 118.8, 116.5, 43.4, 21.6, 21.5.

**MS (EI)**  $m/z$  562 (M<sup>+</sup>); **HRMS (ESI)** Calcd for  $\text{C}_{29}\text{H}_{23}\text{ClN}_2\text{O}_4\text{S}+\text{H}$  563.0866, Found 563.0870.

.....  
.....

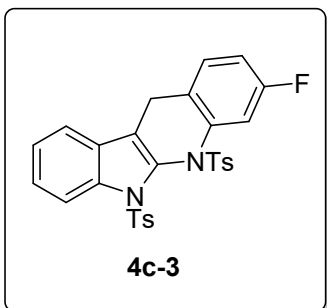

**3-fluoro-5,6-ditosyl-6,11-dihydro-5H-indolo[2,3-b]quinoline**

$C_{29}H_{23}FN_2O_4S_2$       MW: 546.11 g·mol<sup>-1</sup>

Light yellow solid

**Isolated Amount:** 92.8 mg      **Yield:** 85%.

**<sup>1</sup>H NMR (400 MHz, CDCl<sub>3</sub>, δ ppm):** 7.90 (d, *J* = 8.1 Hz, 1H), 7.47 (d, *J* = 7.3 Hz, 2H), 7.42 (d, *J* = 6.6 Hz, 1H), 7.35 (d, *J* = 7.4 Hz, 1H), 7.30 (d, *J* = 8.1 Hz, 3H), 7.22 (dd, *J* = 18.5, 10.2 Hz, 3H), 7.12 (d, *J* = 7.7 Hz, 2H), 6.91 (d, *J* = 7.9 Hz, 2H), 4.78 (s, 2H), 2.28 (s, 3H), 2.20 (s, 3H).

**<sup>13</sup>C NMR (100 MHz, CDCl<sub>3</sub>, δ ppm):** 162.3, 159.8, 145.0, 144.1, 137.0, 136.1, 135.0, 134.9, 131.6, 131.5, 130.0, 129.8, 129.7, 128.1, 127.1, 126.9, 126.6, 126.2, 125.0, 123.4, 120.3, 116.2, 115.6, 113.5, 45.6, 21.6, 21.6.

**MS (EI)** *m/z* 546 (M<sup>+</sup>); **HRMS (ESI)** Calcd for C<sub>29</sub>H<sub>23</sub>FN<sub>2</sub>O<sub>4</sub>S<sub>2</sub>+H 547.1162, Found 547.1167.

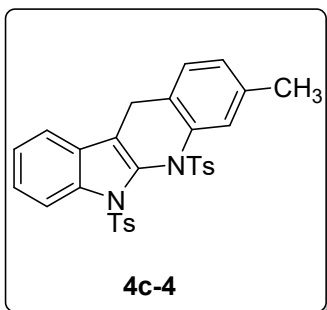

**3-methyl-5,6-ditosyl-6,11-dihydro-5H-indolo[2,3-b]quinoline**

$C_{30}H_{26}N_2O_4S_2$       MW: 542.67 g·mol<sup>-1</sup>

Light yellow solid

**Isolated Amount:** 91.1 mg      **Yield:** 84%.

**<sup>1</sup>H NMR (400 MHz, CDCl<sub>3</sub>, δ ppm):** 7.96 (d, *J* = 7.3 Hz, 1H), 7.57-7.49 (m, 3H), 7.41 (d, *J* = 7.5 Hz, 3H), 7.26 (s, 3H), 7.17 (d, *J* = 7.8 Hz, 2H), 7.07 (d, *J* = 8.1 Hz, 1H), 6.99 (d, *J* = 7.8 Hz, 2H), 4.83 (s, 2H), 2.38 (s, 3H), 2.35 (s, 3H), 2.28 (s, 3H).

**<sup>13</sup>C NMR (100 MHz, CDCl<sub>3</sub>, δ ppm):** 144.8, 143.9, 139.0, 136.2, 135.4, 135.1, 133.5, 129.7, 129.5, 127.9, 127.5, 126.8, 126.6, 126.4, 126.1, 125.6, 124.8, 124.4, 122.7, 118.8, 116.5, 43.4, 21.6, 21.5, 21.4.

**MS (EI)** *m/z* 542 (M<sup>+</sup>); **HRMS (ESI)** Calcd for C<sub>30</sub>H<sub>26</sub>N<sub>2</sub>O<sub>4</sub>S<sub>2</sub>+H 543.1412, Found 543.1419.

.....

.....

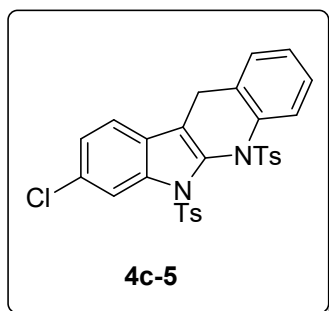

**8-chloro-5,6-ditosyl-6,11-dihydro-5H-indolo[2,3-b]quinoline**

C<sub>29</sub>H<sub>23</sub>ClN<sub>2</sub>O<sub>4</sub>S<sub>2</sub>      MW: 563.08 g·mol<sup>-1</sup>

Light yellow solid

**Isolated Amount:** 90.1mg      **Yield:** 80%.

**<sup>1</sup>H NMR (400 MHz, CDCl<sub>3</sub>, δ ppm):** 7.93 (d, *J* = 8.8 Hz, 1H), 7.72 (d, *J* = 7.4 Hz, 1H), 7.51 (d, *J* = 7.6 Hz, 1H), 7.47 (d, *J* = 7.6 Hz, 4H), 7.37 (s, 1H), 7.28 (q, *J* = 8.6, 7.9 Hz, 3H), 7.18 (d, *J* = 7.7 Hz, 2H), 7.07 (d, *J* = 7.7 Hz, 2H), 4.80 (s, 2H), 2.35 (s, 3H), 2.32 (s, 3H).

**<sup>13</sup>C NMR (100 MHz, CDCl<sub>3</sub>, δ ppm):** 144.8, 143.9, 139.0, 136.2, 135.4, 135.1, 133.5, 129.7, 129.5, 127.9, 127.5, 126.8, 126.6, 126.4, 126.1, 125.6, 124.8, 124.4, 122.7, 118.8, 116.5, 43.4, 21.6, 21.5.

**MS (EI)** *m/z* 562 (M<sup>+</sup>); **HRMS (ESI)** Calcd for C<sub>29</sub>H<sub>23</sub>ClN<sub>2</sub>O<sub>4</sub>S<sub>2</sub>+H 563.0866 Found 563.0863.

.....

.....

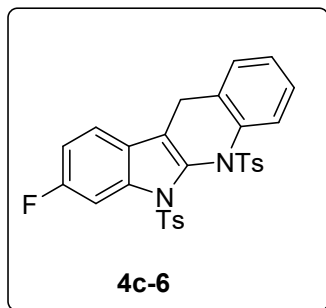

**8-fluoro-5,6-ditosyl-6,11-dihydro-5H-indolo[2,3-b]quinoline**

$C_{29}H_{23}FN_2O_4S_2$       MW: 546.11 g·mol<sup>-1</sup>

Light yellow solid

**Isolated Amount:** 89.5 mg      **Yield:** 82%.

**<sup>1</sup>H NMR (400 MHz, CDCl<sub>3</sub>, δ ppm):** 7.93 (d, *J* = 8.8 Hz, 1H), 7.72 (d, *J* = 7.4 Hz, 1H), 7.51 (d, *J* = 7.6 Hz, 1H), 7.47 (d, *J* = 7.6 Hz, 4H), 7.37 (s, 1H), 7.28 (q, *J* = 8.6, 7.9 Hz, 3H), 7.18 (d, *J* = 7.7 Hz, 2H), 7.07 (d, *J* = 7.7 Hz, 2H), 4.80 (s, 2H), 2.35 (s, 3H), 2.32 (s, 3H).

**<sup>13</sup>C NMR (100 MHz, CDCl<sub>3</sub>, δ ppm):** 162.3, 159.8, 145.0, 144.1, 137.0, 136.1, 135.0, 134.9, 131.6, 131.5, 130.0, 129.8, 129.7, 128.1, 127.1, 126.9, 126.6, 126.2, 125.0, 123.4, 120.3, 116.2, 115.6, 113.5, 45.6, 21.6, 21.6.

**MS (EI)** *m/z* 546 (M<sup>+</sup>); **HRMS (ESI)** Calcd for C<sub>29</sub>H<sub>23</sub>FN<sub>2</sub>O<sub>4</sub>S<sub>2</sub>+H 547.1162, Found 547.1165.

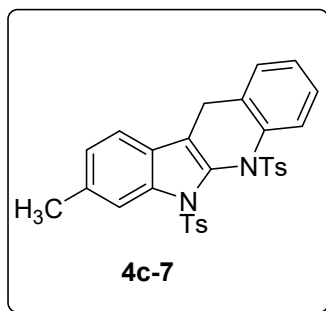

**8-methyl-5,6-ditosyl-6,11-dihydro-5H-indolo[2,3-b]quinoline**

$C_{30}H_{26}N_2O_4S_2$       MW: 542.67 g·mol<sup>-1</sup>

Light yellow solid

**Isolated Amount:** 89 mg      **Yield:** 82%.

**<sup>1</sup>H NMR (400 MHz, CDCl<sub>3</sub>, δ ppm):** 7.96 (d, *J* = 7.3 Hz, 1H), 7.57 – 7.49 (m, 3H), 7.41 (d, *J* = 7.5 Hz, 3H), 7.26 (s, 3H), 7.17 (d, *J* = 7.8 Hz, 2H), 7.07 (d, *J* = 8.1 Hz, 1H), 6.99 (d, *J* = 7.8 Hz, 2H), 4.83 (s, 2H), 2.38 (s, 3H), 2.35 (s, 3H), 2.28 (s, 3H).

**<sup>13</sup>C NMR (100 MHz, CDCl<sub>3</sub>, δ ppm):** 144.8, 143.9, 139.0, 136.2, 135.4, 135.1, 133.5, 129.7, 129.5, 127.9, 127.5, 126.8, 126.6, 126.4, 126.1, 125.6, 124.8, 124.4, 122.7, 118.8, 116.5, 43.4, 21.6, 21.5, 21.4.

**MS (EI)** *m/z* 542 (M<sup>+</sup>); **HRMS (ESI)** Calcd for C<sub>30</sub>H<sub>26</sub>N<sub>2</sub>O<sub>4</sub>S<sub>2</sub>+H 543.1412, Found 543.1418.

.....  
.....

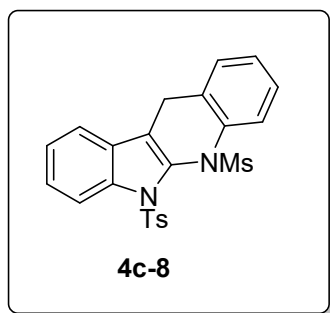

**5-(methylsulfonyl)-6-tosyl-6,11-dihydro-5H-indolo[2,3-b]quinoline**

C<sub>23</sub>H<sub>20</sub>N<sub>2</sub>O<sub>4</sub>S<sub>2</sub>      **MW:** 452.54 g·mol<sup>-1</sup>

yellow solid

**Isolated Amount:** 76 mg      **Yield:** 84%.

**<sup>1</sup>H NMR (400 MHz, CDCl<sub>3</sub>, δ ppm):** 8.31 (d, *J* = 8.3 Hz, 1H), 8.17 (d, *J* = 7.8 Hz, 1H), 7.60 (d, *J* = 7.9 Hz, 1H), 7.39 – 7.34 (m, 3H), 7.30 (d, *J* = 7.4 Hz, 2H), 7.23 – 7.18 (m, 3H), 6.91 (d, *J* = 7.9 Hz, 2H), 4.74 (s, 2H), 2.17 (s, 3H), 2.07 (s, 3H).

**<sup>13</sup>C NMR (100 MHz, CDCl<sub>3</sub>, δ ppm):** 144.8, 143.9, 139.0, 136.2, 135.4, 135.1, 133.5, 127.9, 127.5, 126.6, 126.1, 125.6, 124.8, 124.4, 122.7, 118.8, 116.5, 43.4, 21.6, 21.5.

**MS (EI)** *m/z* 452 (M<sup>+</sup>); **HRMS (ESI)** Calcd for C<sub>23</sub>H<sub>20</sub>N<sub>2</sub>O<sub>4</sub>S+H 453.0943, Found 453.0940.

.....  
.....

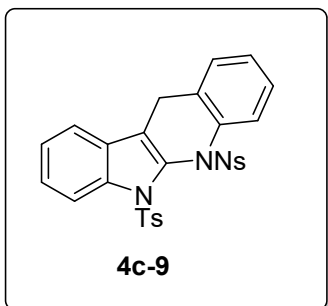

**5-((4-nitrophenyl)sulfonyl)-6-tosyl-6,11-dihydro-5H-indolo[2,3-b]quinoline**

$C_{28}H_{21}N_3O_6S_2$       MW: 559.61 g·mol<sup>-1</sup>

yellow solid

**Isolated Amount:** 48.1mg      **Yield:**43%

**<sup>1</sup>H NMR (400 MHz, CDCl<sub>3</sub>, δ ppm):** 7.98 (d, *J* = 7.9 Hz, 1H), 7.69 (d, *J* = 7.1 Hz, 1H), 7.54 (d, *J* = 7.2 Hz, 1H), 7.50 (d, *J* = 7.9 Hz, 2H), 7.44 (d, *J* = 7.8 Hz, 2H), 7.41 (d, *J* = 7.2 Hz, 1H), 7.28 (d, *J* = 9.4 Hz, 4H), 7.17 (d, *J* = 7.8 Hz, 2H), 7.02 (d, *J* = 7.8 Hz, 2H), 4.86 (s, 2H), 2.34 (s, 3H).

**<sup>13</sup>C NMR (100 MHz, CDCl<sub>3</sub>, δ ppm):** 144.8, 143.9, 139.0, 136.2, 135.4, 135.1, 133.5, 129.7, 129.5, 127.9, 127.5, 126.8, 126.6, 126.4, 126.1, 125.6, 124.8, 124.4, 122.7, 118.8, 116.5, 43.4, 21.5.

**MS (EI)** m/z 559 (M<sup>+</sup>); **HRMS (ESI)** Calcd for C<sub>28</sub>H<sub>21</sub>N<sub>3</sub>O<sub>6</sub>S<sub>2</sub>+H 560.0950, Found 560.0957.

.....

.....

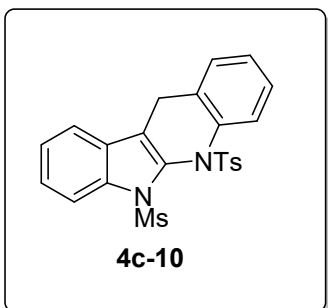

**5-(methylsulfonyl)-6-tosyl-6,11-dihydro-5H-indolo[2,3-b]quinoline**

$C_{23}H_{20}N_2O_4S_2$       MW: 452.54 g·mol<sup>-1</sup>

yellow solid

**Isolated Amount:** 74.2 mg      **Yield:** 82%.

**<sup>1</sup>H NMR (400 MHz, CDCl<sub>3</sub>, δ ppm):** 8.31 (d, *J* = 8.3 Hz, 1H), 8.17 (d, *J* = 7.8 Hz, 1H), 7.60 (d, *J* = 7.9 Hz, 1H), 7.39 – 7.34 (m, 3H), 7.30 (d, *J* = 7.4 Hz, 2H), 7.23 – 7.18 (m, 3H), 6.91 (d, *J* = 7.9 Hz, 2H), 4.74 (s, 2H), 2.17 (s, 3H), 2.07 (s, 3H).

**<sup>13</sup>C NMR (100 MHz, CDCl<sub>3</sub>, δ ppm):** 144.8, 143.9, 139.0, 136.2, 135.4, 135.1, 133.5, 129.7, 129.5, 127.9, 127.5, 126.6, 126.1, 125.6, 124.8, 124.4, 122.7, 118.8, 116.5, 43.4, 21.6, 21.5.

**MS (EI)** *m/z* 452 (M<sup>+</sup>); **HRMS (ESI)** Calcd for C<sub>23</sub>H<sub>20</sub>N<sub>2</sub>O<sub>4</sub>S+H 453.0943, Found 453.0940.

.....

.....

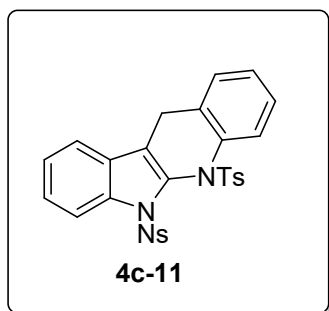

**6-((4-nitrophenyl)sulfonyl)-5-tosyl-6,11-dihydro-5H-indolo[2,3-b]quinoline**

C<sub>28</sub>H<sub>21</sub>N<sub>3</sub>O<sub>6</sub>S<sub>2</sub>      **MW:** 559.61 g·mol<sup>-1</sup>

yellow solid

**Isolated Amount:** 45.8mg      **Yield:**41%

**<sup>1</sup>H NMR (400 MHz, CDCl<sub>3</sub>, δ ppm):** 7.98 (d, *J* = 7.9 Hz, 1H), 7.69 (d, *J* = 7.1 Hz, 1H), 7.54 (d, *J* = 7.2 Hz, 1H), 7.50 (d, *J* = 7.9 Hz, 2H), 7.44 (d, *J* = 7.8 Hz, 2H), 7.41 (d, *J* = 7.2 Hz, 1H), 7.28 (d, *J* = 9.4 Hz, 4H), 7.17 (d, *J* = 7.8 Hz, 2H), 7.02 (d, *J* = 7.8 Hz, 2H), 4.86 (s, 2H), 2.34 (s, 3H).

**<sup>13</sup>C NMR (100 MHz, CDCl<sub>3</sub>, δ ppm):** 144.8, 143.9, 139.0, 136.2, 135.4, 135.1, 133.5, 129.7, 129.5, 127.9, 127.5, 126.8, 126.6, 126.4, 126.1, 125.6, 124.8, 124.4, 122.7, 118.8, 116.5, 43.4, 21.6.

**MS (EI)** *m/z* 559 (M<sup>+</sup>); **HRMS (ESI)** Calcd for C<sub>28</sub>H<sub>21</sub>N<sub>3</sub>O<sub>6</sub>S<sub>2</sub>+H 560.0950, Found 560.0952.

.....

.....

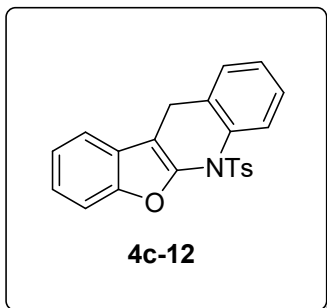

**6-tosyl-6,11-dihydrobenzofuro[2,3-b]quinoline**

$C_{22}H_{17}NO_3S$                       MW: 375.44 g·mol<sup>-1</sup>

yellow solid

**Isolated Amount:** 67.5mg                      **Yield:** 90%.

**<sup>1</sup>H NMR (400 MHz, CDCl<sub>3</sub>, δ ppm):** 7.83 (d, *J* = 7.5 Hz, 1H), 7.51 (d, *J* = 7.0 Hz, 1H), 7.48 – 7.42 (m, 1H), 7.42 – 7.31 (m, 3H), 7.26 (s, 3H), 7.05 (d, *J* = 7.7 Hz, 2H), 6.66 (d, *J* = 7.7 Hz, 2H), 5.10 (s, 2H), 2.06 (s, 3H).

**<sup>13</sup>C NMR (100 MHz, CDCl<sub>3</sub>, δ ppm):** 144.8, 143.9, 139.0, 136.2, 135.4, 135.1, 133.5, 129.7, 129.5, 127.9, 127.5, 126.6, 126.1, 125.6, 124.8, 124.4, 122.7, 118.8, 116.5, 43.4, 21.5.

**MS (EI)** *m/z* 375 (M<sup>+</sup>); **HRMS (ESI)** Calcd for C<sub>22</sub>H<sub>17</sub>NO<sub>3</sub>S+H 376.1007, Found 376.1010.

.....  
 .....

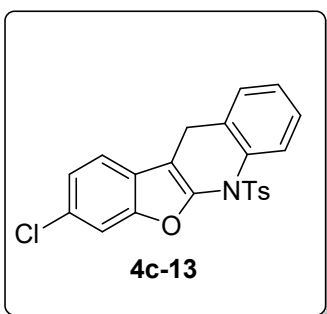

**3-chloro-6-tosyl-6,11-dihydrobenzofuro[2,3-b]quinoline**

$C_{22}H_{16}ClNO_3S$                       MW: 409.88 g·mol<sup>-1</sup>

Light yellow solid

**Isolated Amount:** 72.9 mg                      **Yield:** 89%.

**<sup>1</sup>H NMR (400 MHz, CDCl<sub>3</sub>, δ ppm):** 7.76 (d, *J* = 8.6 Hz, 1H), 7.51 – 7.43 (m, 2H), 7.34



(t,  $J = 8.1$  Hz, 2H), 7.28 (d,  $J = 9.7$  Hz, 3H), 7.08 (d,  $J = 7.8$  Hz, 2H), 6.69 (d,  $J = 7.8$  Hz, 2H), 5.09 (s, 2H), 2.07 (s, 3H).

**$^{13}\text{C}$  NMR (100 MHz,  $\text{CDCl}_3$ ,  $\delta$  ppm):** 144.8, 143.9, 139.0, 136.2, 135.4, 135.1, 133.5, 129.7, 129.5, 127.9, 127.5, 126.6, 126.1, 125.6, 124.8, 124.4, 122.7, 118.8, 116.5, 43.4, 21.5.

**MS (EI)**  $m/z$  409 ( $\text{M}^+$ ); **HRMS (ESI)** Calcd for  $\text{C}_{22}\text{H}_{16}\text{ClNO}_3\text{S}+\text{H}$  410.0618, Found 410.0622.

.....

.....

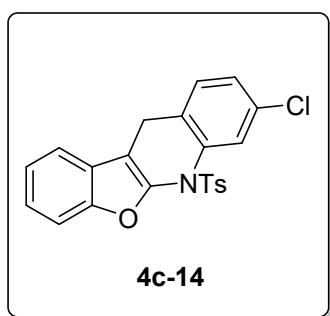

**(8-chloro-6-tosyl-6,11-dihydrobenzofuro[2,3-b]quinoline**

$\text{C}_{22}\text{H}_{16}\text{ClNO}_3\text{S}$       **MW:** 409.88  $\text{g}\cdot\text{mol}^{-1}$ ,

Light Yellow Solid

**Isolated Amount:** 72.9 mg      **Yield:** 89%.

**$^1\text{H}$  NMR (400 MHz,  $\text{CDCl}_3$ ,  $\delta$  ppm):** 7.76 (d,  $J = 8.6$  Hz, 1H), 7.51 – 7.43 (m, 2H), 7.34 (t,  $J = 8.1$  Hz, 2H), 7.28 (d,  $J = 9.7$  Hz, 3H), 7.08 (d,  $J = 7.8$  Hz, 2H), 6.69 (d,  $J = 7.8$  Hz, 2H), 5.09 (s, 2H), 2.07 (s, 3H).

**$^{13}\text{C}$  NMR (100 MHz,  $\text{CDCl}_3$ ,  $\delta$  ppm):** 144.8, 143.9, 139.0, 136.2, 135.4, 135.1, 133.5, 129.7, 129.5, 127.9, 127.5, 126.6, 126.1, 125.6, 124.8, 124.4, 122.7, 118.8, 116.5, 43.4, 21.5.

**MS (EI)**  $m/z$  409 ( $\text{M}^+$ ); **HRMS (ESI)** Calcd for  $\text{C}_{22}\text{H}_{16}\text{ClNO}_3\text{S}+\text{H}$  410.0618, Found 410.0615.

.....

.....

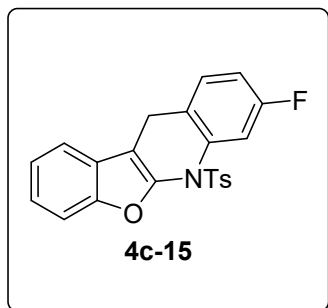

**8-fluoro-6-tosyl-6,11-dihydrobenzofuro[2,3-b]quinoline**

$C_{22}H_{16}FNO_3S$       MW: 393.43  $g \cdot mol^{-1}$ ,

Light Yellow Solid

**Isolated Amount:** 71.6 mg      **Yield:** 91%.

**$^1H$  NMR (400 MHz,  $CDCl_3$ ,  $\delta$  ppm):** 7.76 (d,  $J = 8.6$  Hz, 1H), 7.51 – 7.43 (m, 2H), 7.34 (t,  $J = 8.1$  Hz, 2H), 7.28 (d,  $J = 9.7$  Hz, 3H), 7.08 (d,  $J = 7.8$  Hz, 2H), 6.69 (d,  $J = 7.8$  Hz, 2H), 5.09 (s, 2H), 2.07 (s, 3H).

**$^{13}C$  NMR (100 MHz,  $CDCl_3$ ,  $\delta$  ppm):** 162.3, 159.8, 145.0, 144.1, 137.0, 136.1, 135.0, 134.9, 131.5, 130.0, 129.8, 129.7, 128.1, 126.9, 126.6, 126.2, 125.0, 123.4, 120.3, 116.2, 115.6, 113.5, 45.6, 21.6, 21.6.

**MS (EI)**  $m/z$  393 (M<sup>+</sup>); **HRMS (ESI)** Calcd for  $C_{22}H_{16}FNO_3S+H$  394.0913, Found 394.0917.

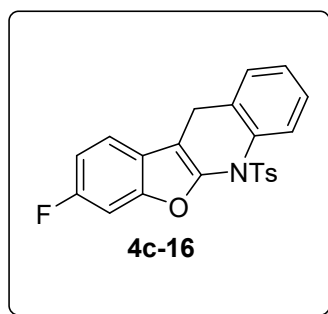

**3-fluoro-6-tosyl-6,11-dihydrobenzofuro[2,3-b]quinoline**

$C_{22}H_{16}FNO_3S$       MW: 393.43  $g \cdot mol^{-1}$

Light yellow solid

**Isolated Amount:** 71.5 mg      **Yield:** 91%.

**$^1H$  NMR (400 MHz,  $CDCl_3$ ,  $\delta$  ppm):** 7.76 (d,  $J = 8.6$  Hz, 1H), 7.51 – 7.43 (m, 2H), 7.34

(t,  $J = 8.1$  Hz, 2H), 7.28 (d,  $J = 9.7$  Hz, 3H), 7.08 (d,  $J = 7.8$  Hz, 2H), 6.69 (d,  $J = 7.8$  Hz, 2H), 5.09 (s, 2H), 2.07 (s, 3H).

**$^{13}\text{C}$  NMR (100 MHz,  $\text{CDCl}_3$ ,  $\delta$  ppm):** 162.3, 159.8, 145.0, 144.1, 137.0, 136.1, 135.0, 134.9, 131.6, 130.0, 129.8, 129.7, 128.1, 127.1, 126.6, 126.2, 125.0, 123.4, 120.3, 116.2, 115.6, 113.5, 45.6, 21.6, 21.6.

**MS (EI)**  $m/z$  393 ( $\text{M}^+$ ); **HRMS (ESI)** Calcd for  $\text{C}_{22}\text{H}_{16}\text{FNO}_3\text{S}+\text{H}$  394.0913, Found 394.0920.

.....  
.....

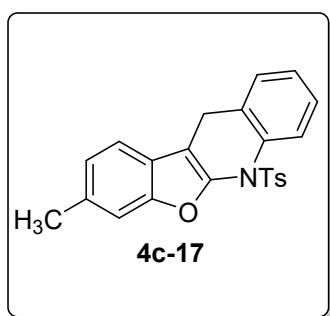

**3-methyl-6-tosyl-6,11-dihydrobenzofuro[2,3-b]quinoline**

$\text{C}_{23}\text{H}_{19}\text{NO}_3\text{S}$                       **MW:** 389.47  $\text{g}\cdot\text{mol}^{-1}$

Light yellow solid

**Isolated Amount:** 69.3 mg                      **Yield:** 89%.

**$^1\text{H}$  NMR (400 MHz,  $\text{CDCl}_3$ ,  $\delta$  ppm):** 7.66 (s, 1H), 7.40 (d,  $J = 8.8$  Hz, 2H), 7.33 (d,  $J = 6.4$  Hz, 1H), 7.24 (d,  $J = 2.4$  Hz, 2H), 7.17 (d,  $J = 7.6$  Hz, 1H), 7.05 (d,  $J = 7.8$  Hz, 2H), 6.65 (d,  $J = 7.8$  Hz, 2H), 5.06 (s, 2H), 2.46 (s, 3H), 2.05 (s, 3H).

**$^{13}\text{C}$  NMR (100 MHz,  $\text{CDCl}_3$ ,  $\delta$  ppm):** 144.8, 143.9, 139.0, 136.2, 135.4, 135.1, 133.5, 129.7, 129.5, 127.9, 127.5, 126.6, 126.1, 125.6, 124.8, 124.4, 122.7, 118.8, 116.5, 43.4, 21.5, 19.6.

**MS (EI)**  $m/z$  389 ( $\text{M}^+$ ); **HRMS (ESI)** Calcd for  $\text{C}_{23}\text{H}_{19}\text{NO}_3\text{S}+\text{H}$  390.1164, Found 390.1165.

.....  
.....

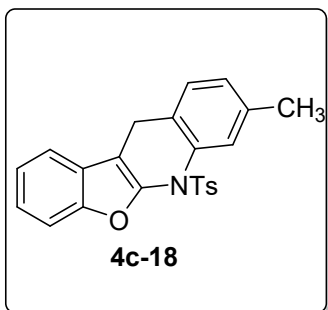

**8-methyl-6-tosyl-6,11-dihydrobenzofuro[2,3-b]quinoline**

$C_{23}H_{19}NO_3S$

**MW:** 389.47g·mol<sup>-1</sup>

Light yellow solid

**Isolated Amount:** 66.9 mg

**Yield:** 86%.

**<sup>1</sup>H NMR (400 MHz, CDCl<sub>3</sub>, δ ppm):** 7.66 (s, 1H), 7.40 (d, *J* = 8.8 Hz, 2H), 7.33 (d, *J* = 6.4 Hz, 1H), 7.24 (d, *J* = 2.4 Hz, 2H), 7.17 (d, *J* = 7.6 Hz, 1H), 7.05 (d, *J* = 7.8 Hz, 2H), 6.65 (d, *J* = 7.8 Hz, 2H), 5.06 (s, 2H), 2.46 (s, 3H), 2.05 (s, 3H).

**<sup>13</sup>C NMR (100 MHz, CDCl<sub>3</sub>, δ ppm):** 144.8, 143.9, 139.0, 136.2, 135.4, 135.1, 133.5, 129.7, 129.5, 127.9, 127.5, 126.6, 126.1, 125.6, 124.8, 124.4, 122.7, 118.8, 116.5, 43.4, 21.5, 19.6.

**MS (EI)** *m/z* 389 (M<sup>+</sup>); **HRMS (ESI)** Calcd for C<sub>23</sub>H<sub>19</sub>NO<sub>3</sub>S+H 390.1164, Found 390.1168.

## 5. Copies of the <sup>1</sup>H NMR and <sup>13</sup>C NMR for Product

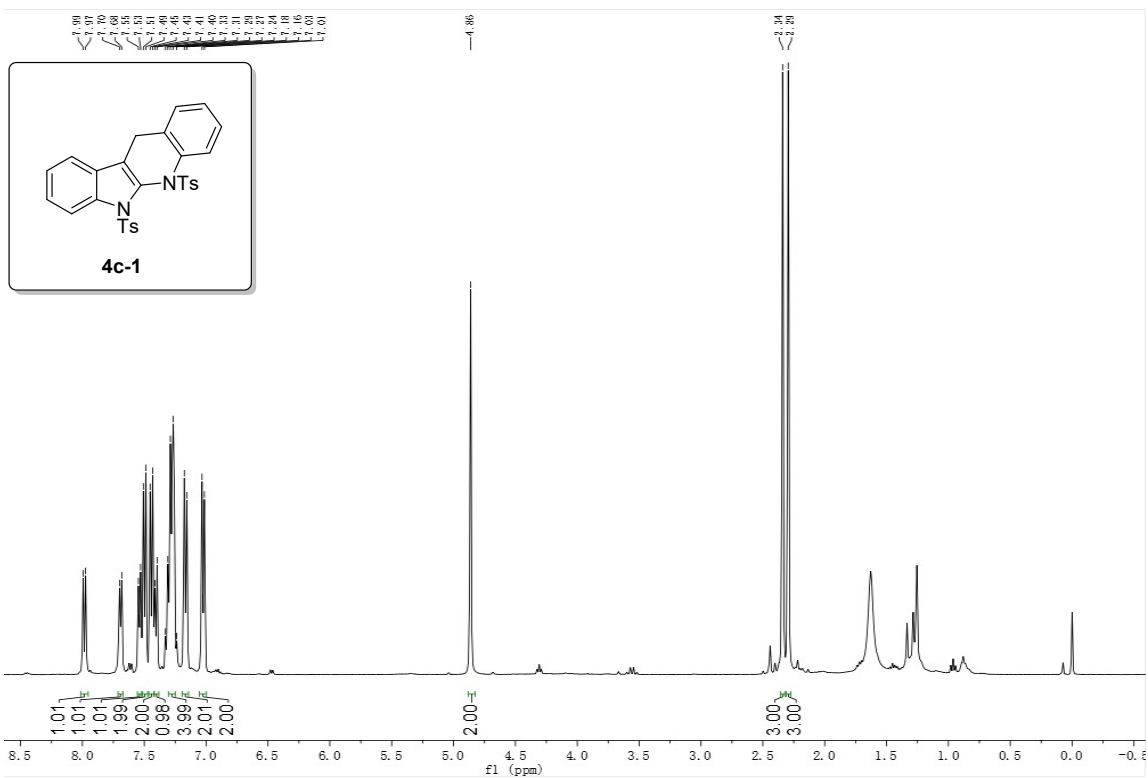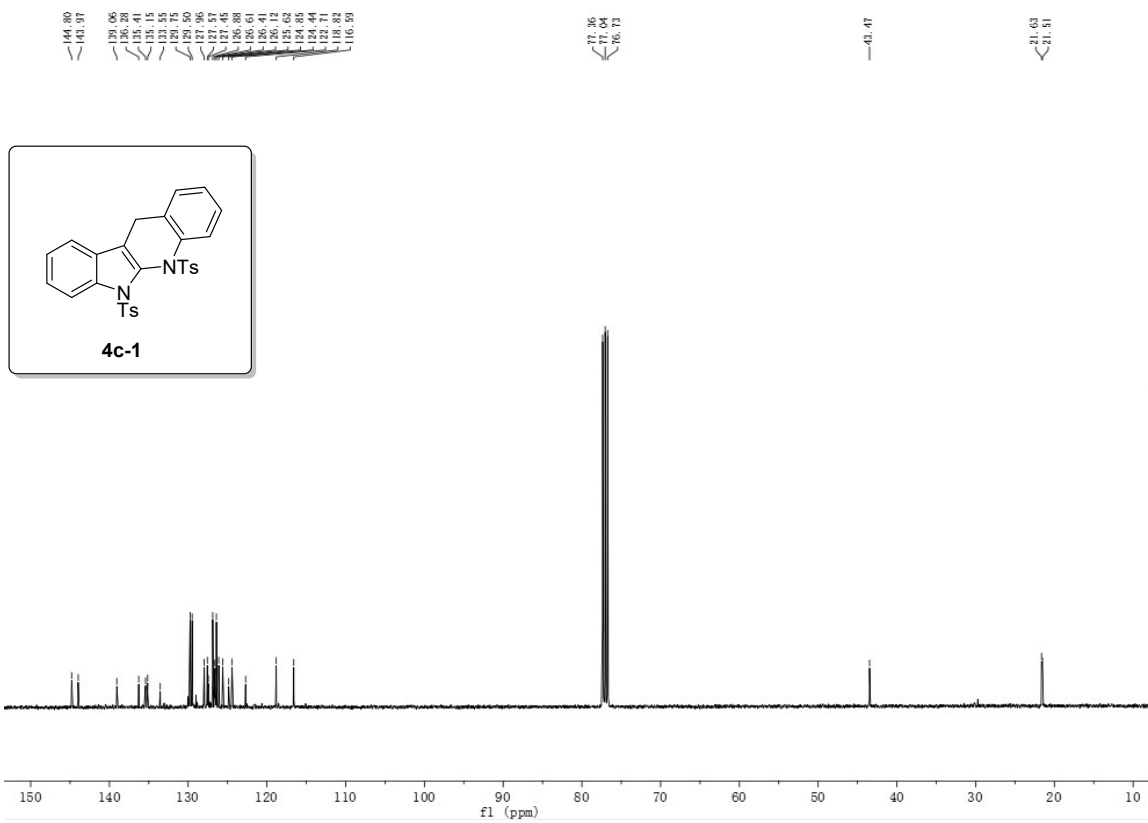

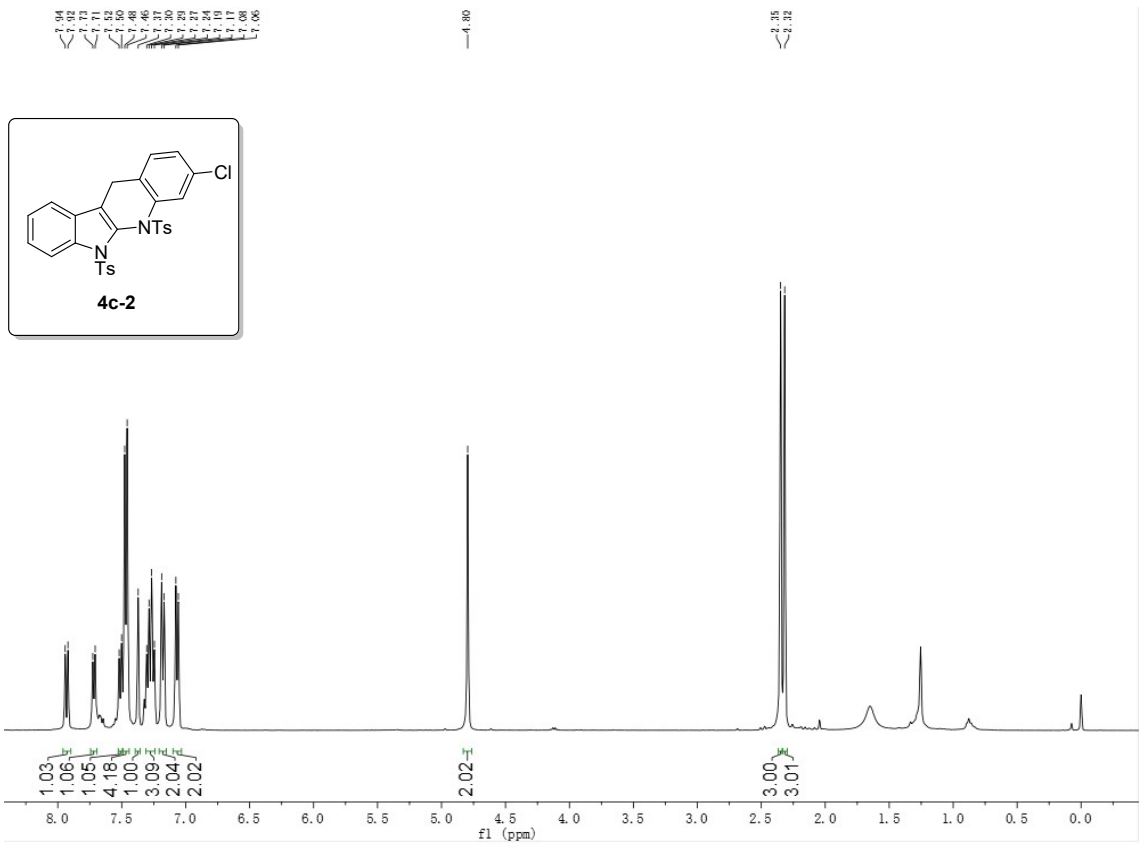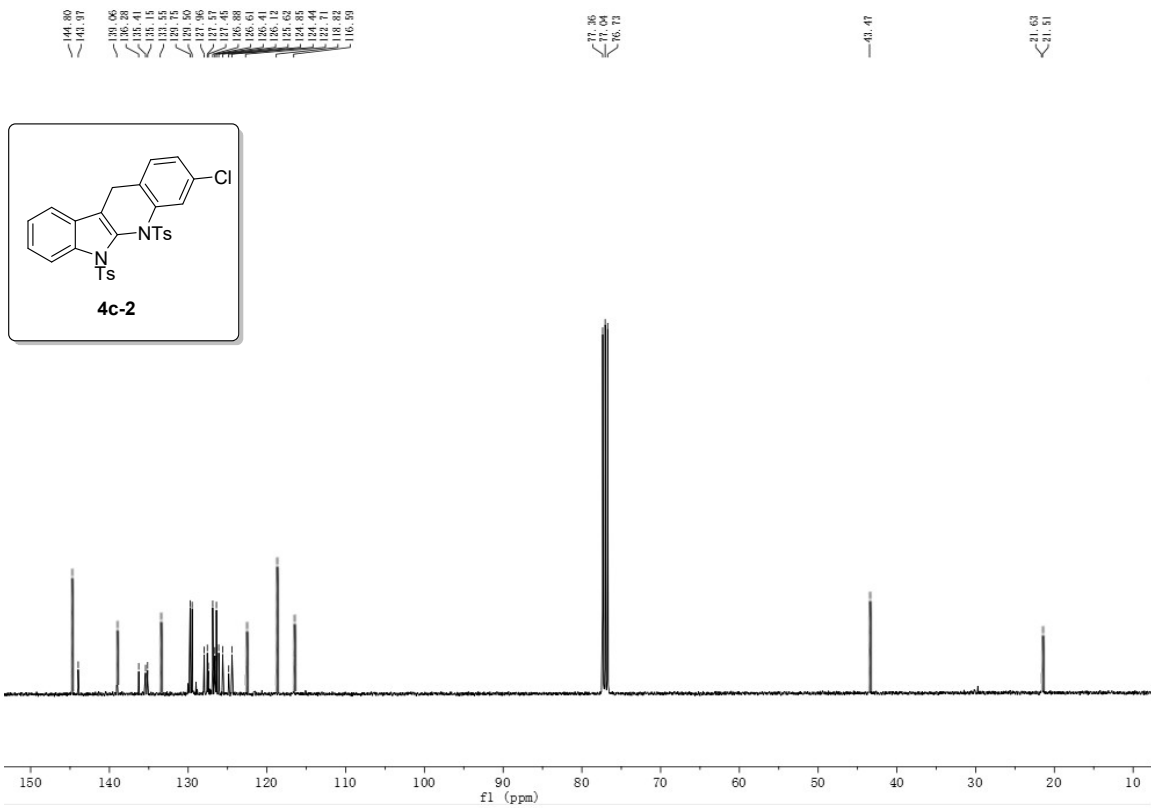

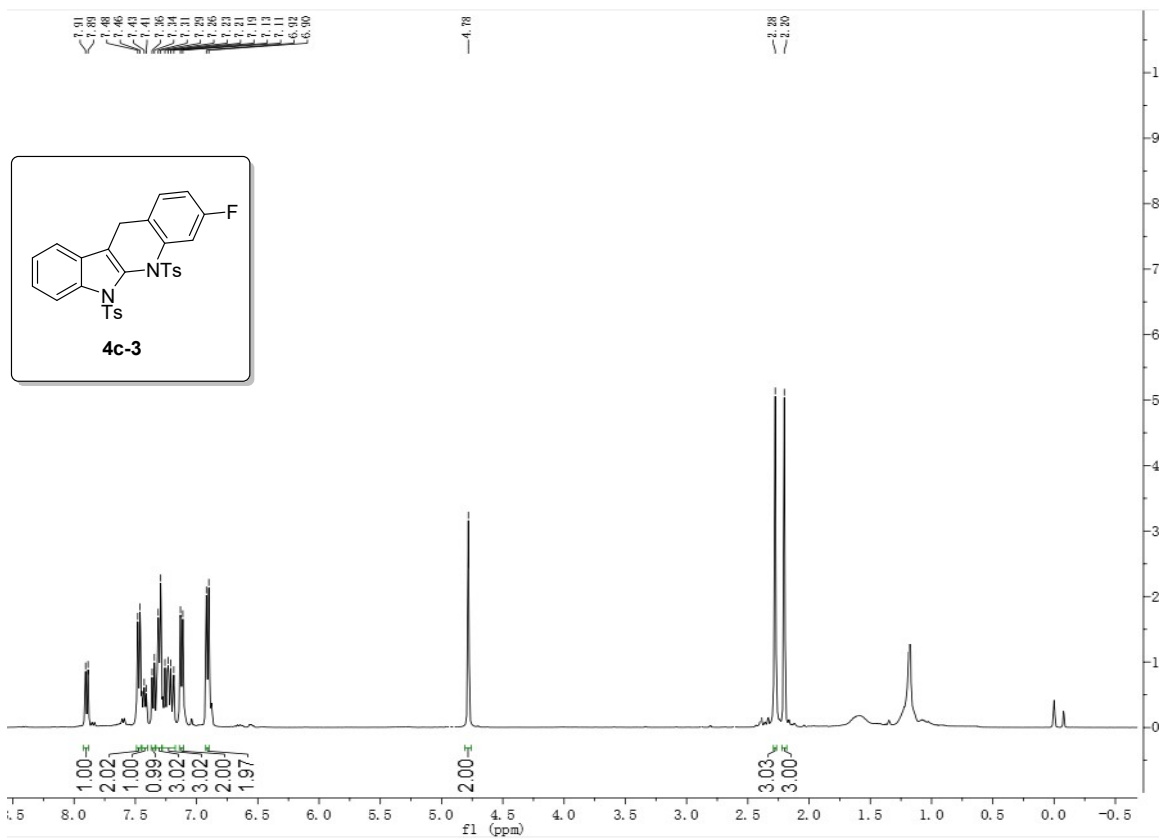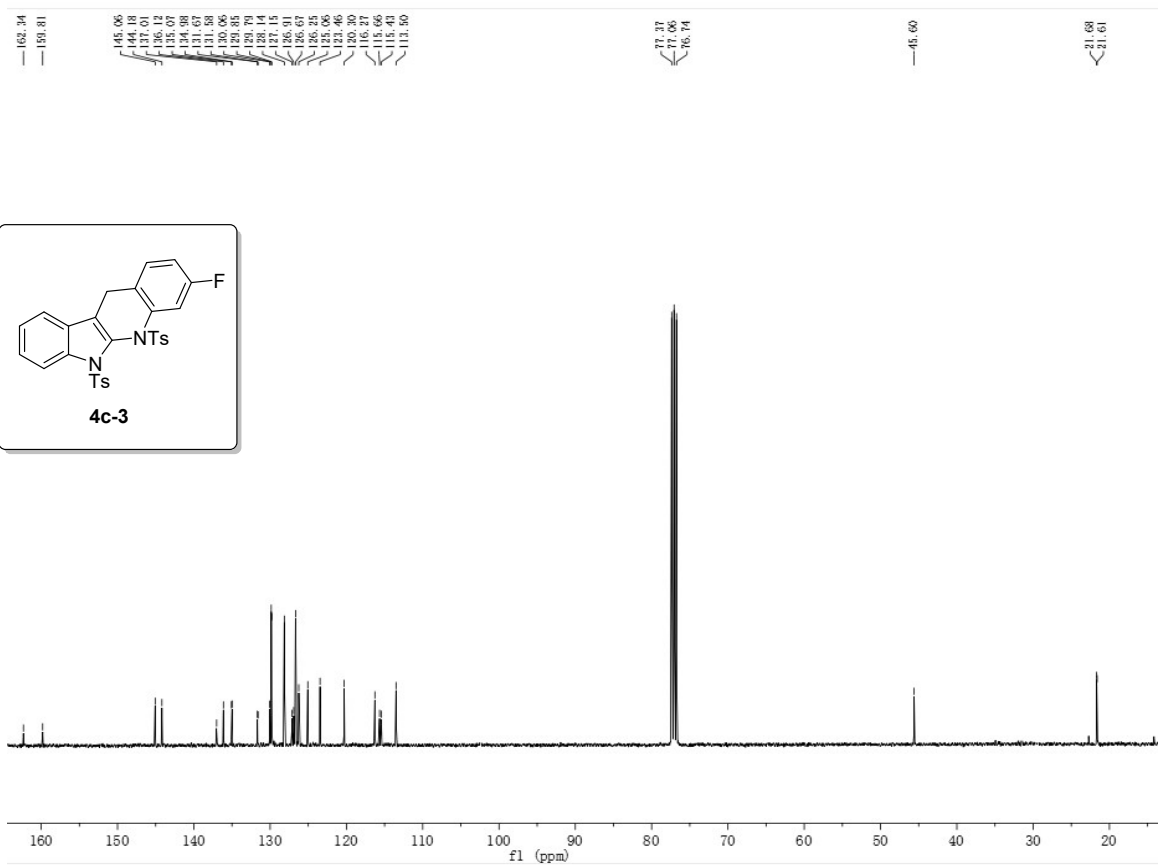

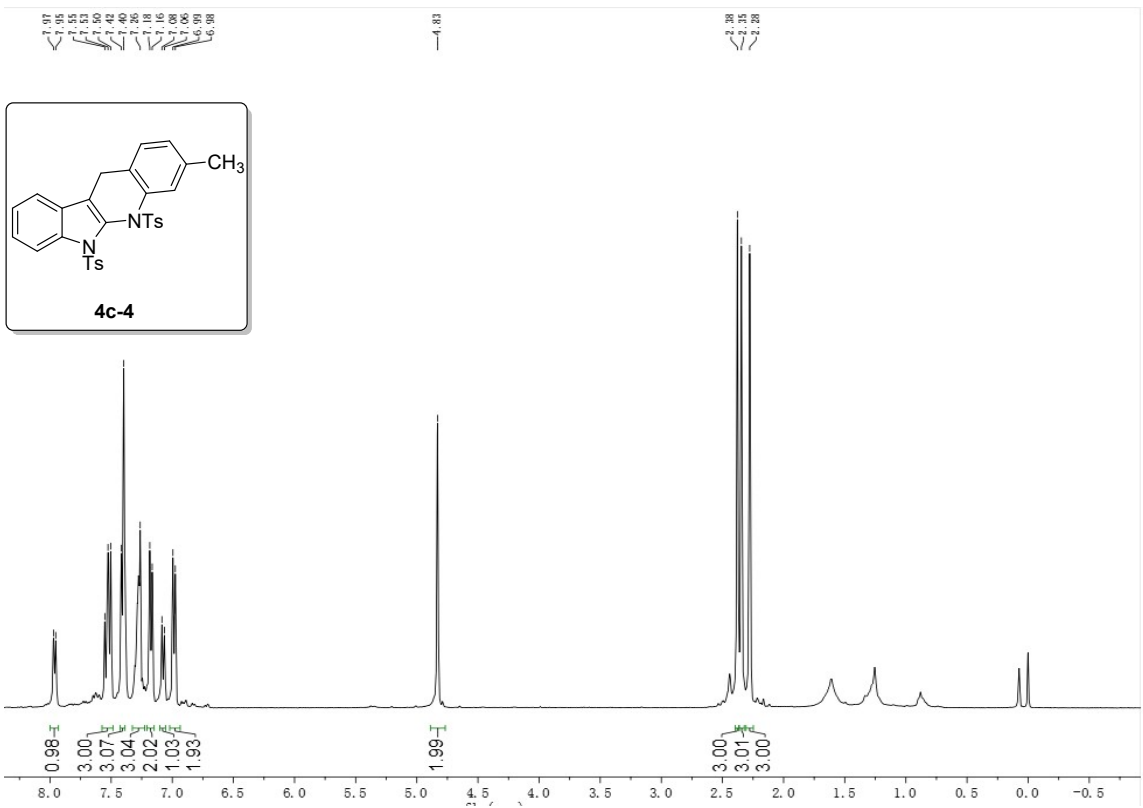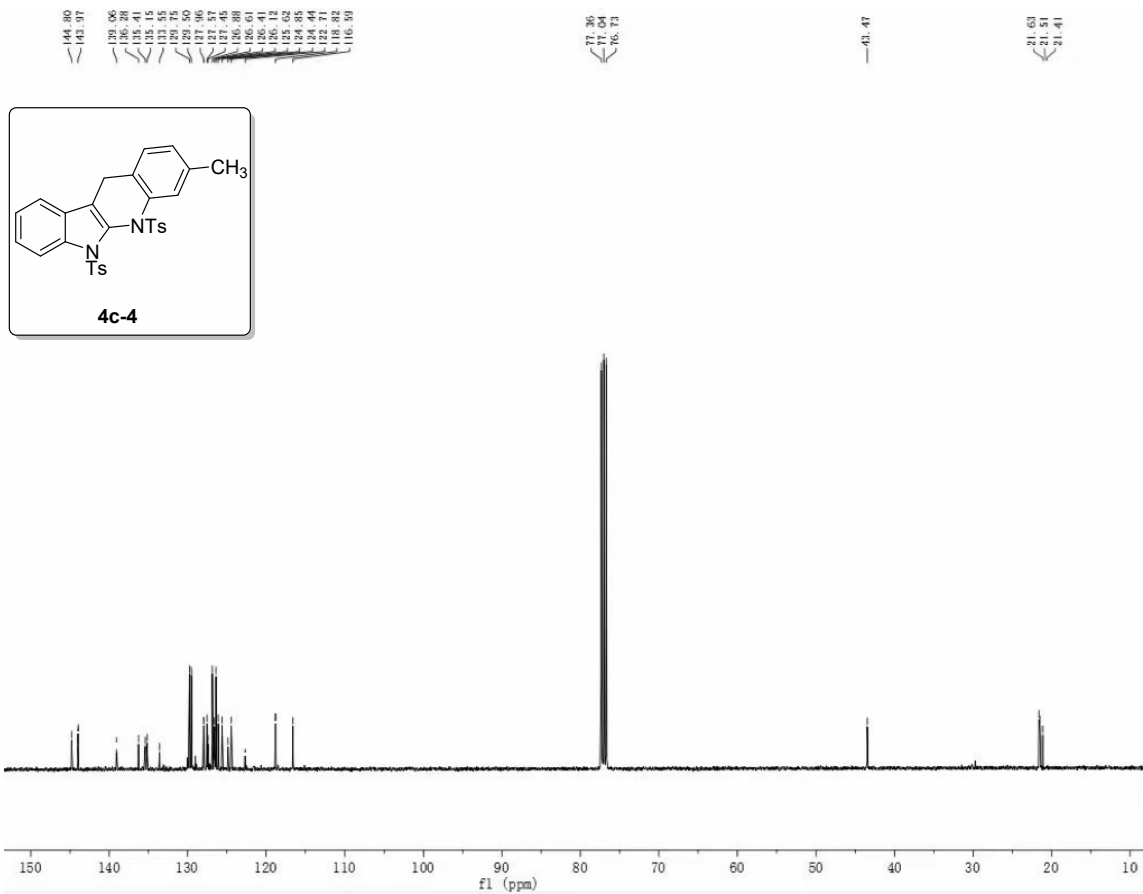



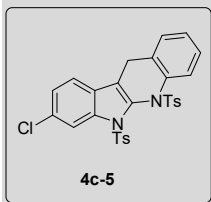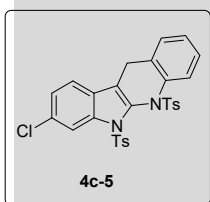



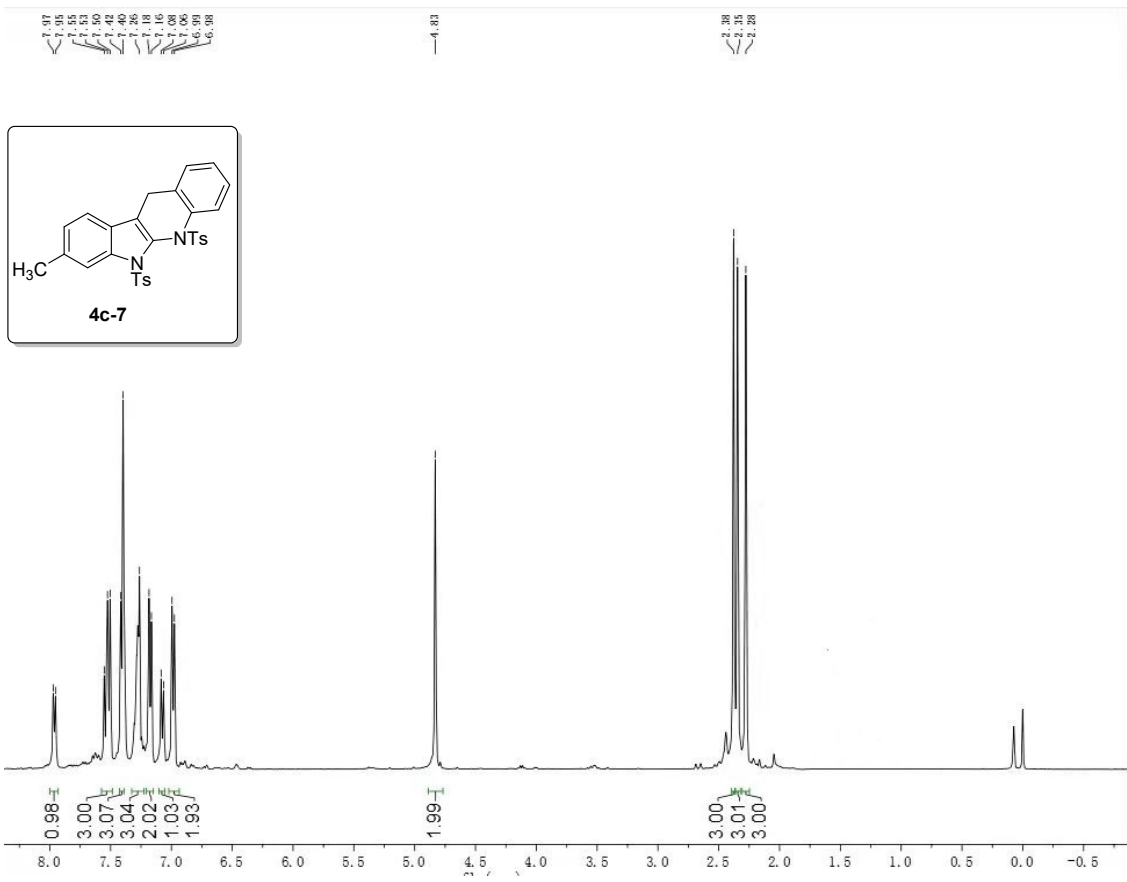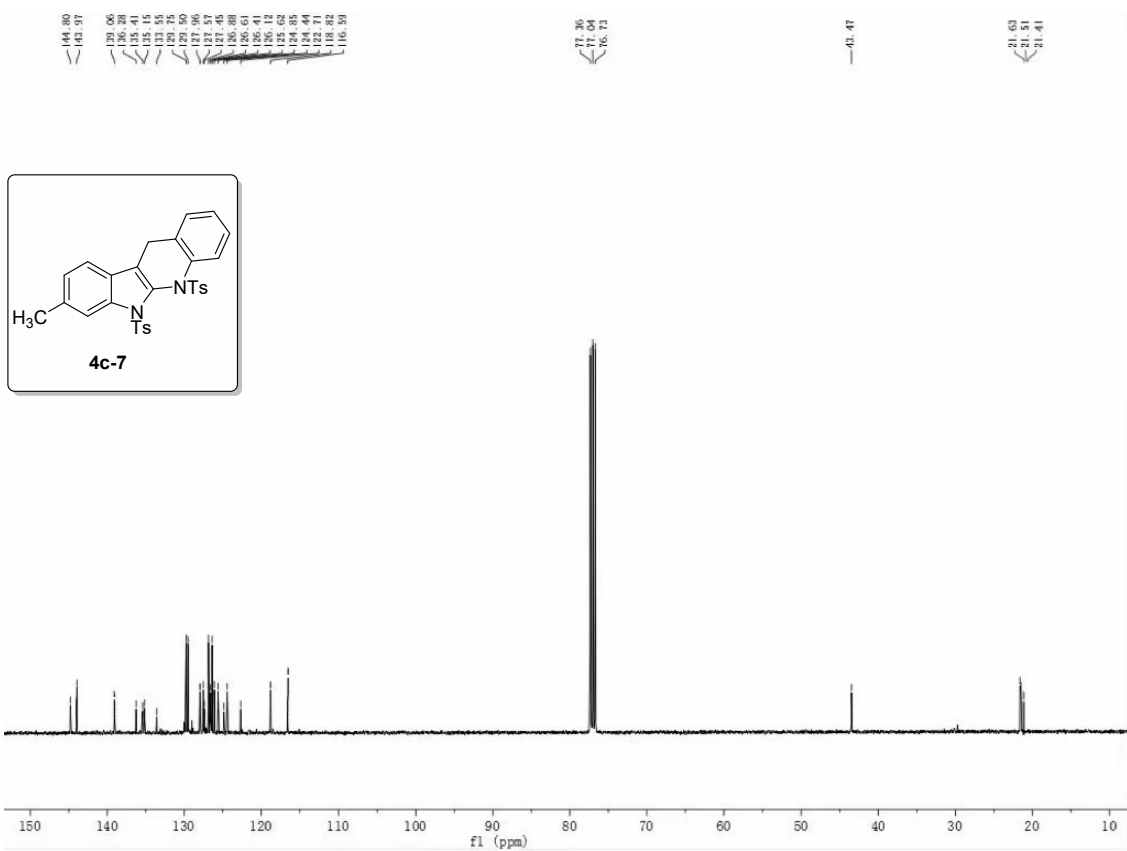

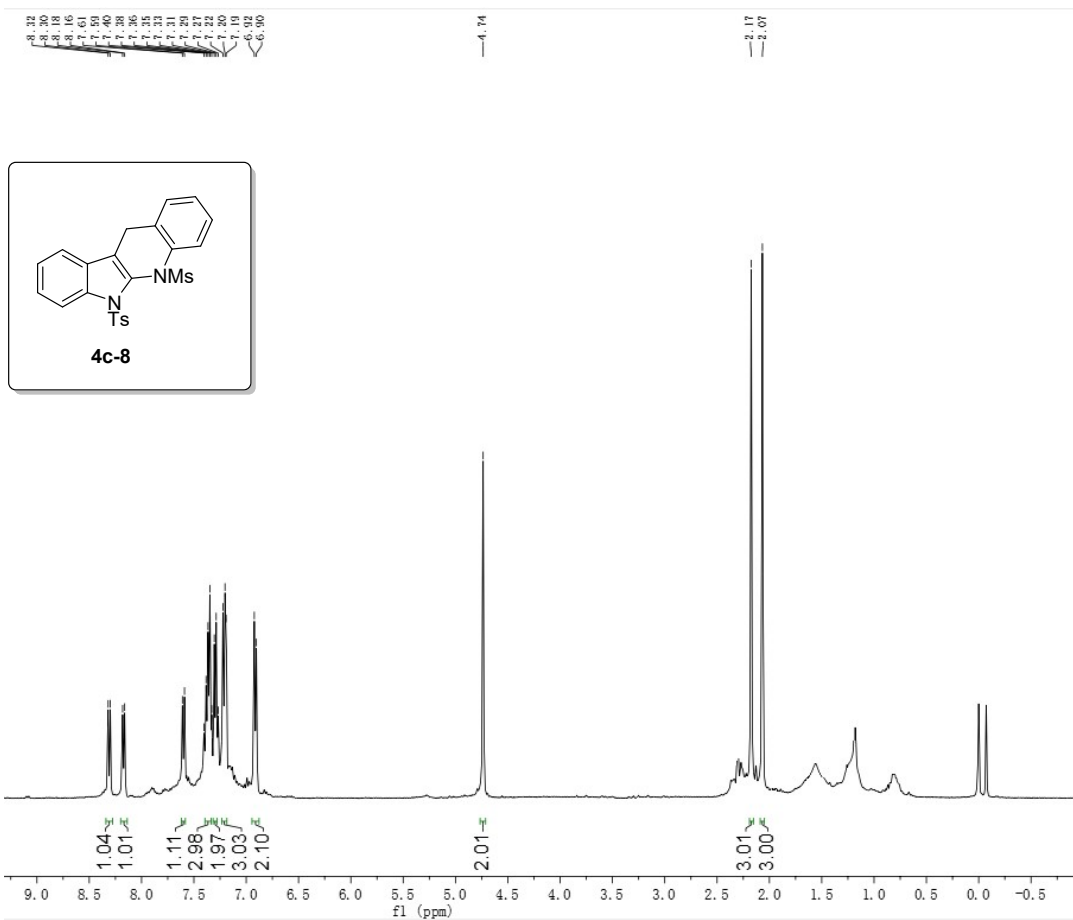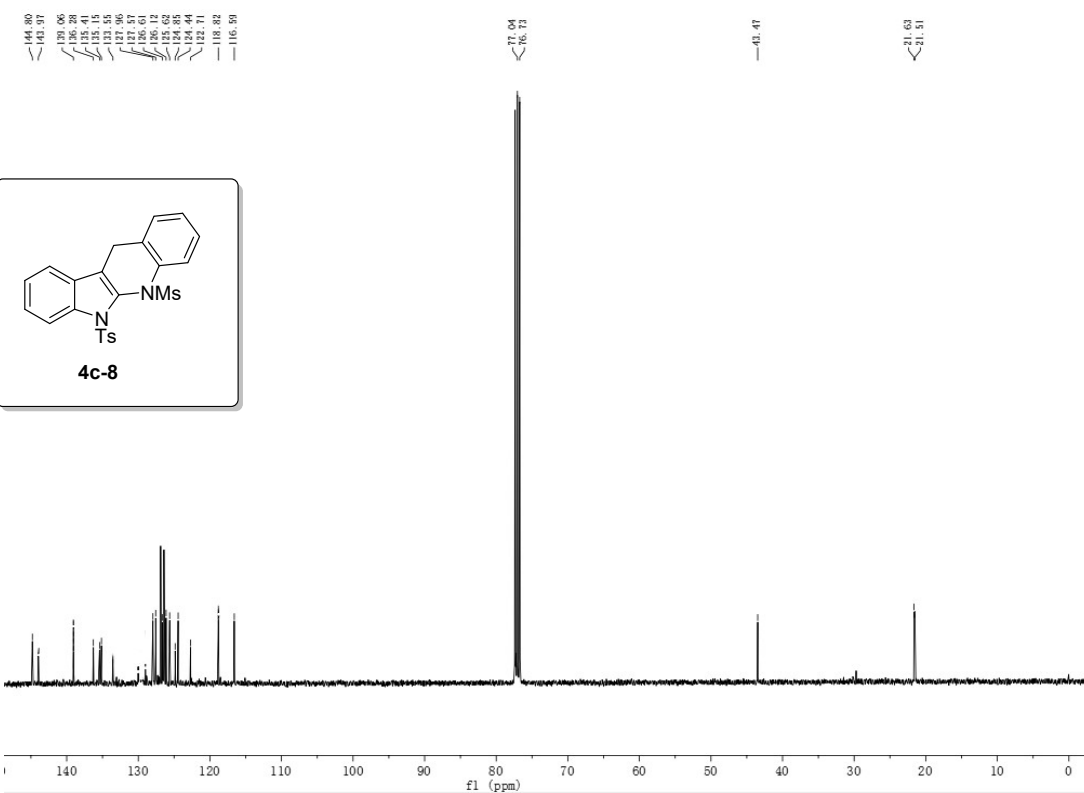



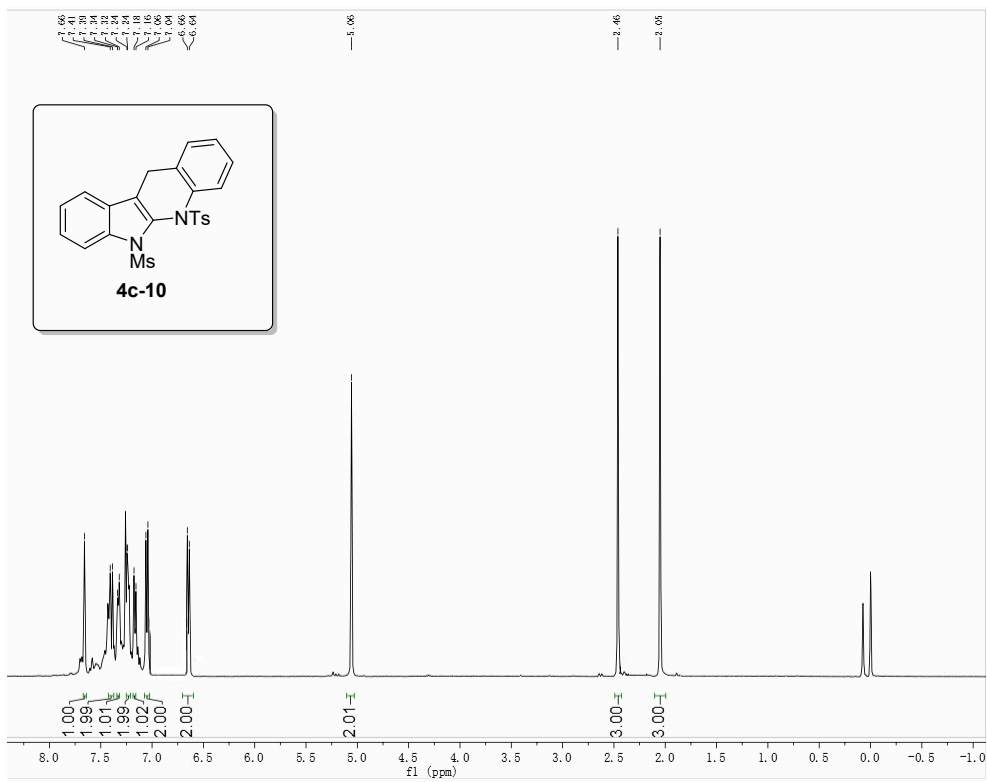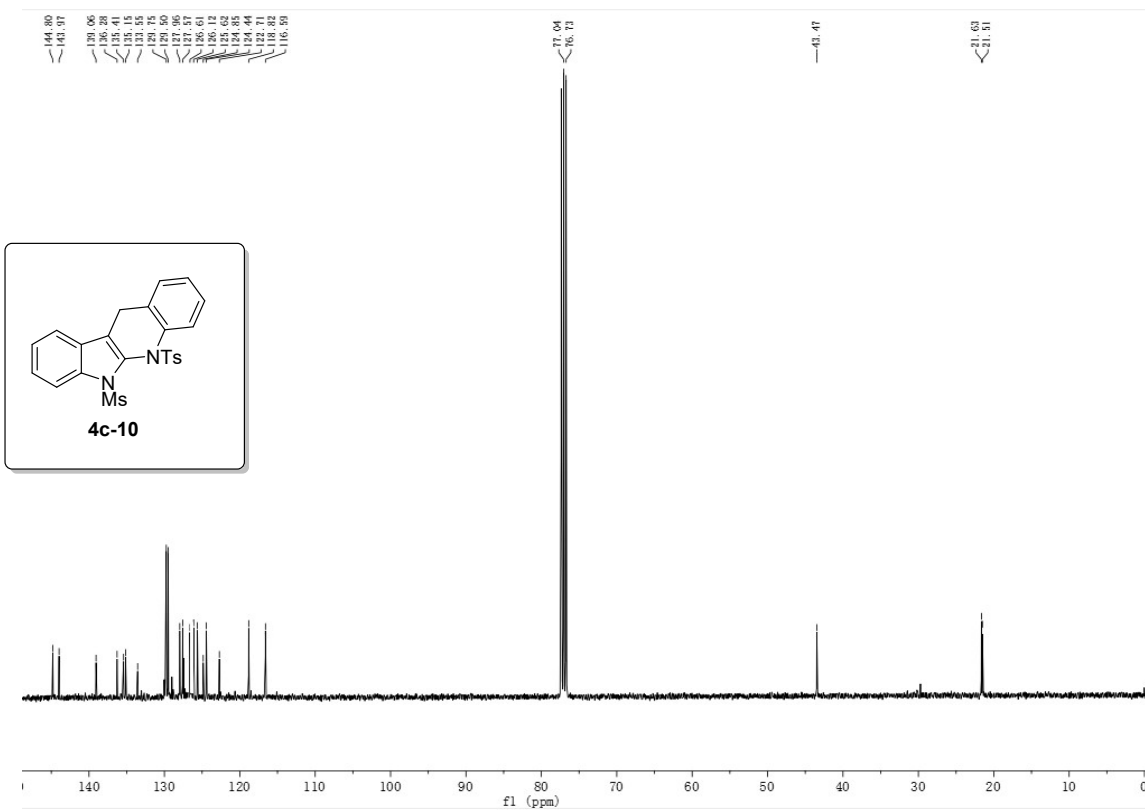



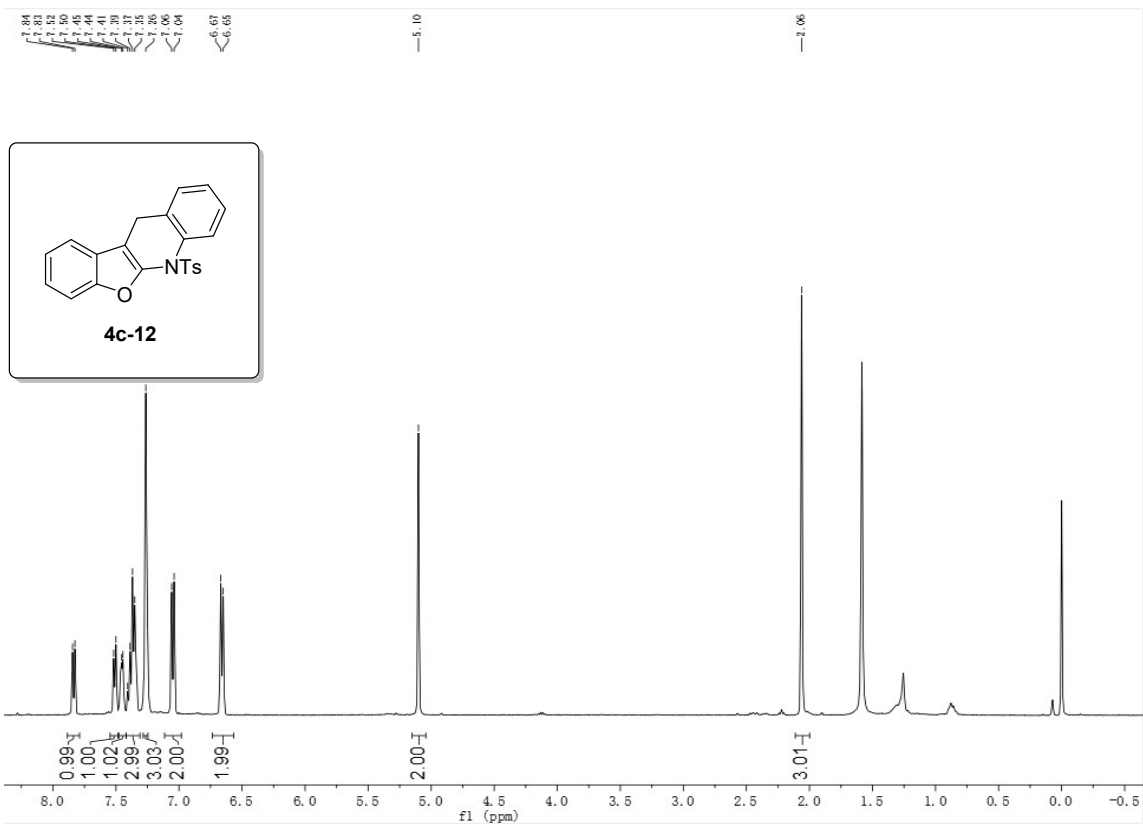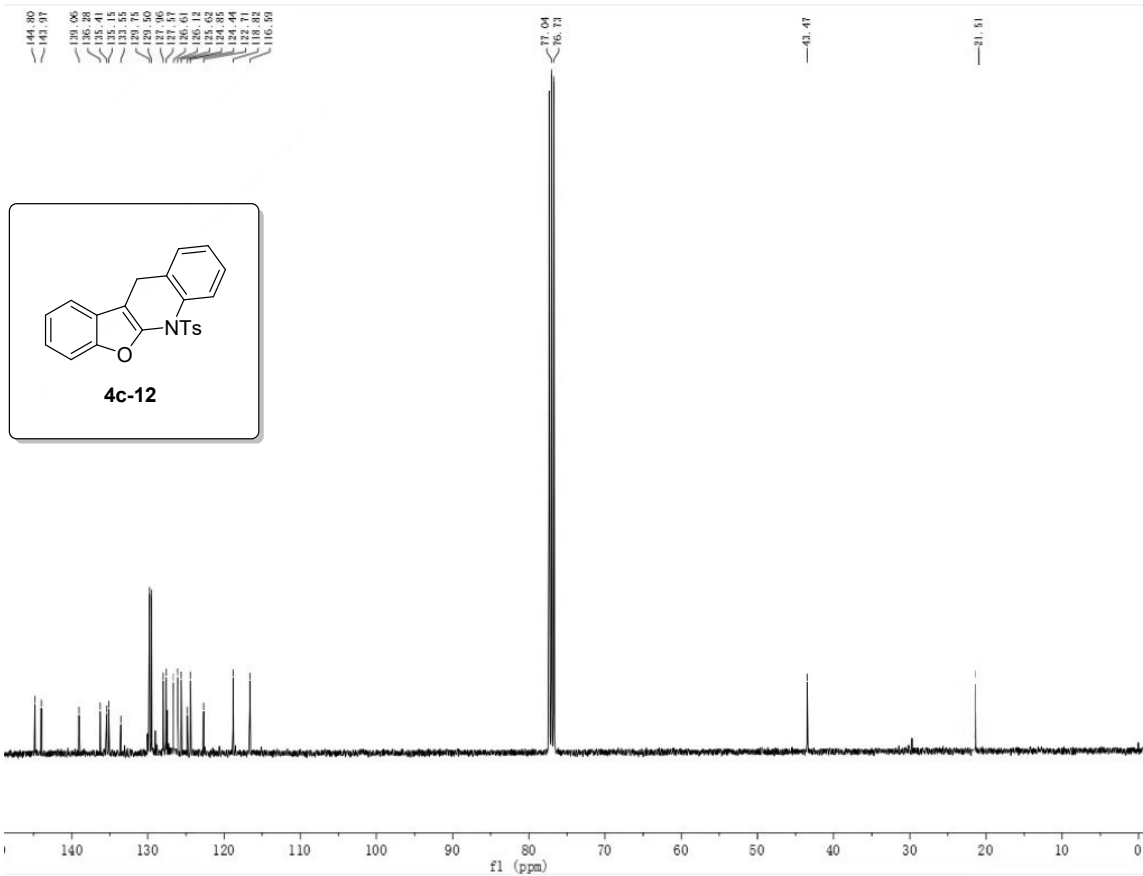



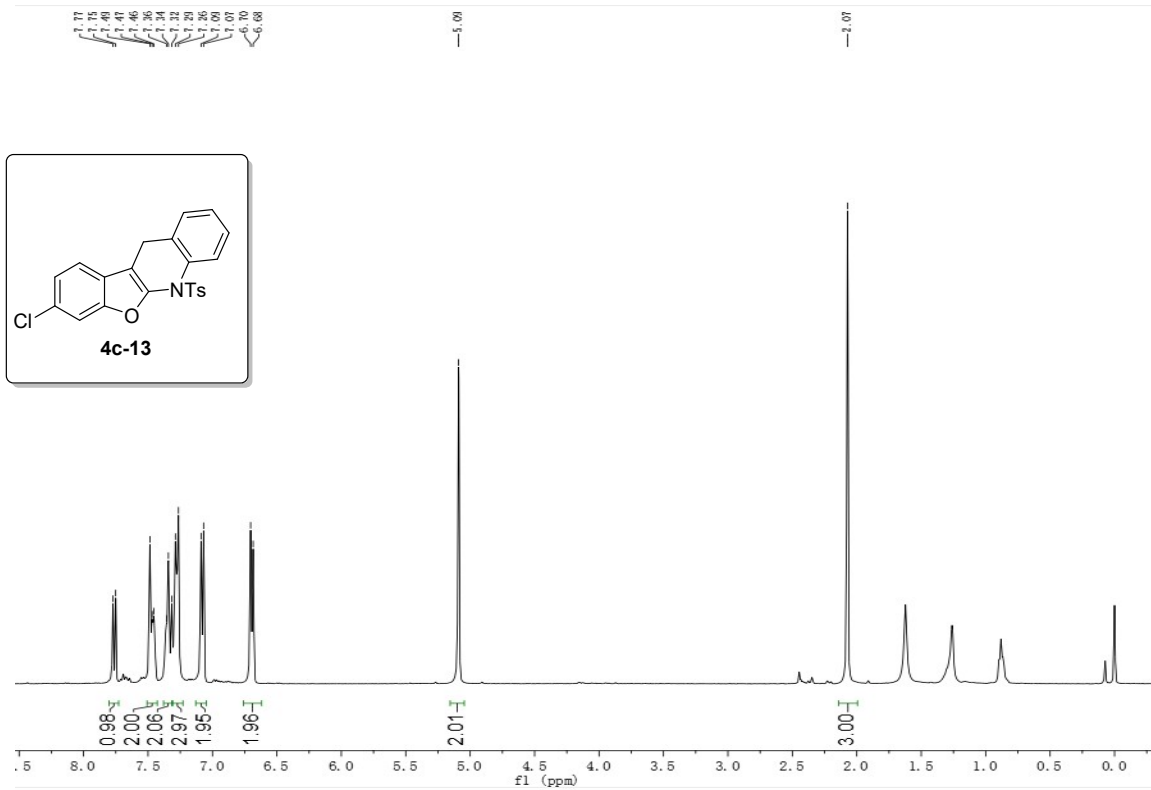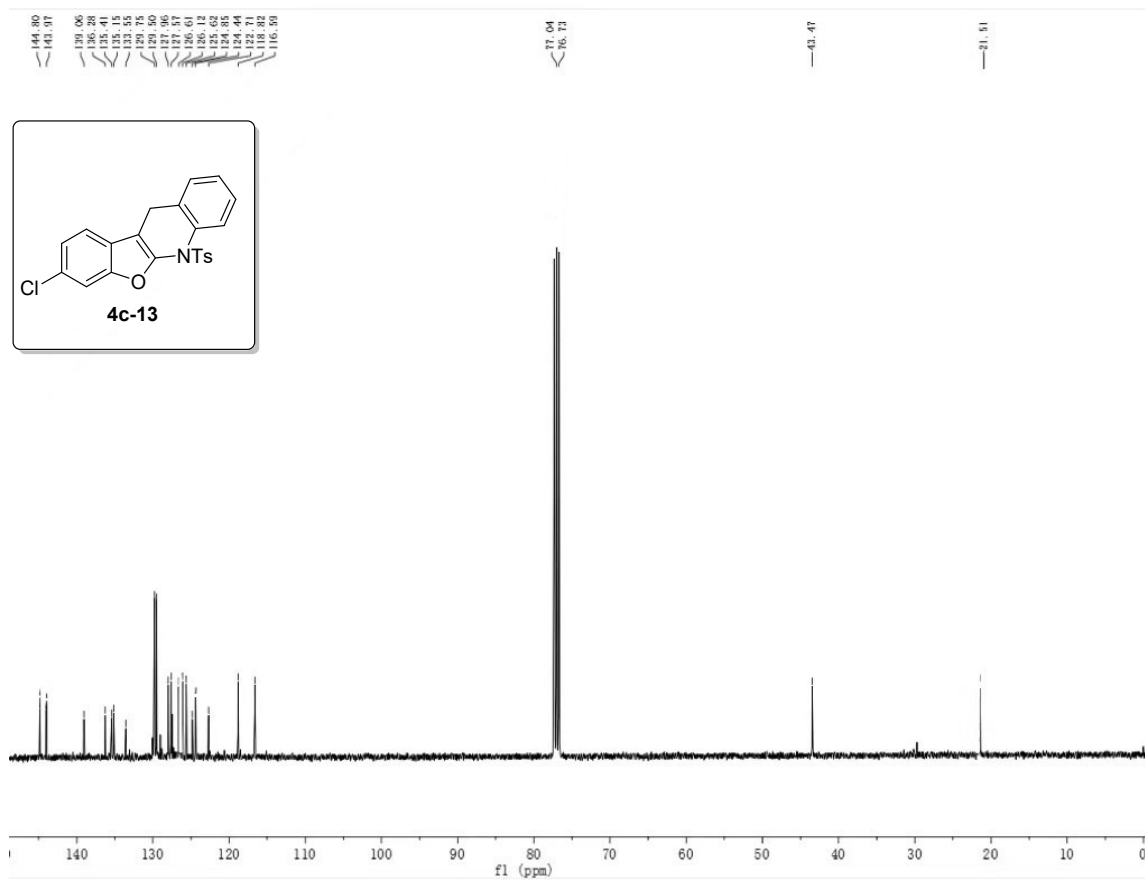

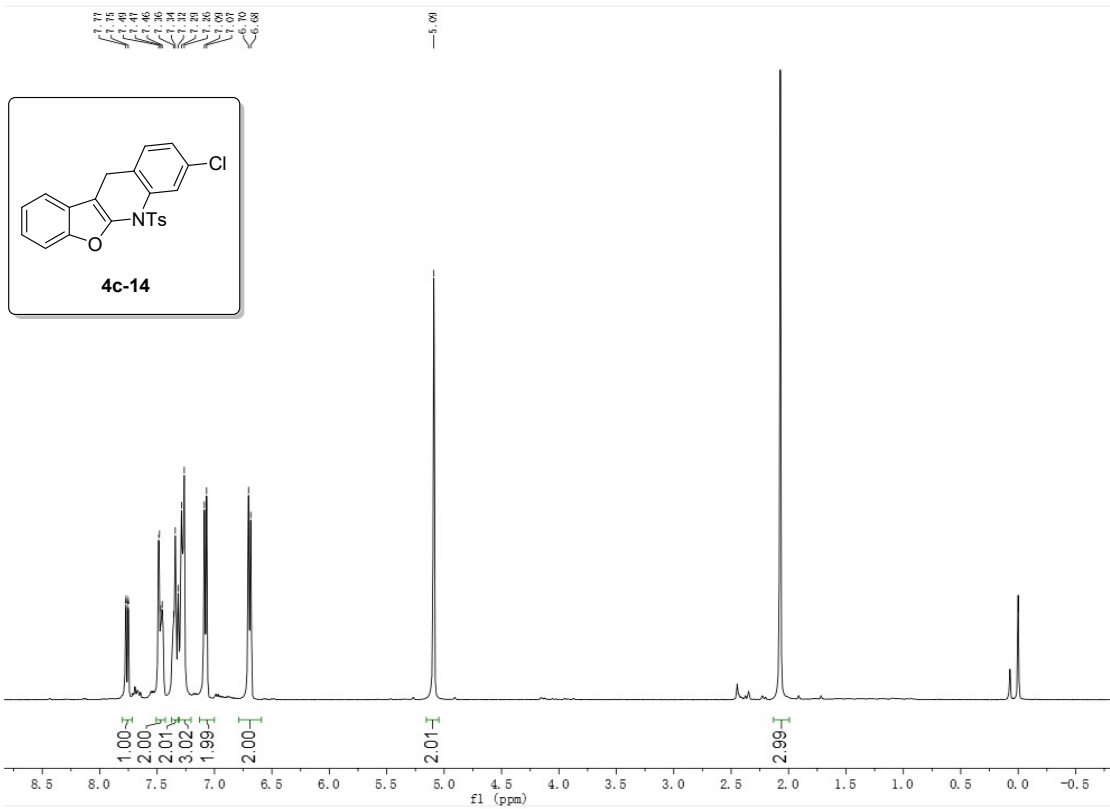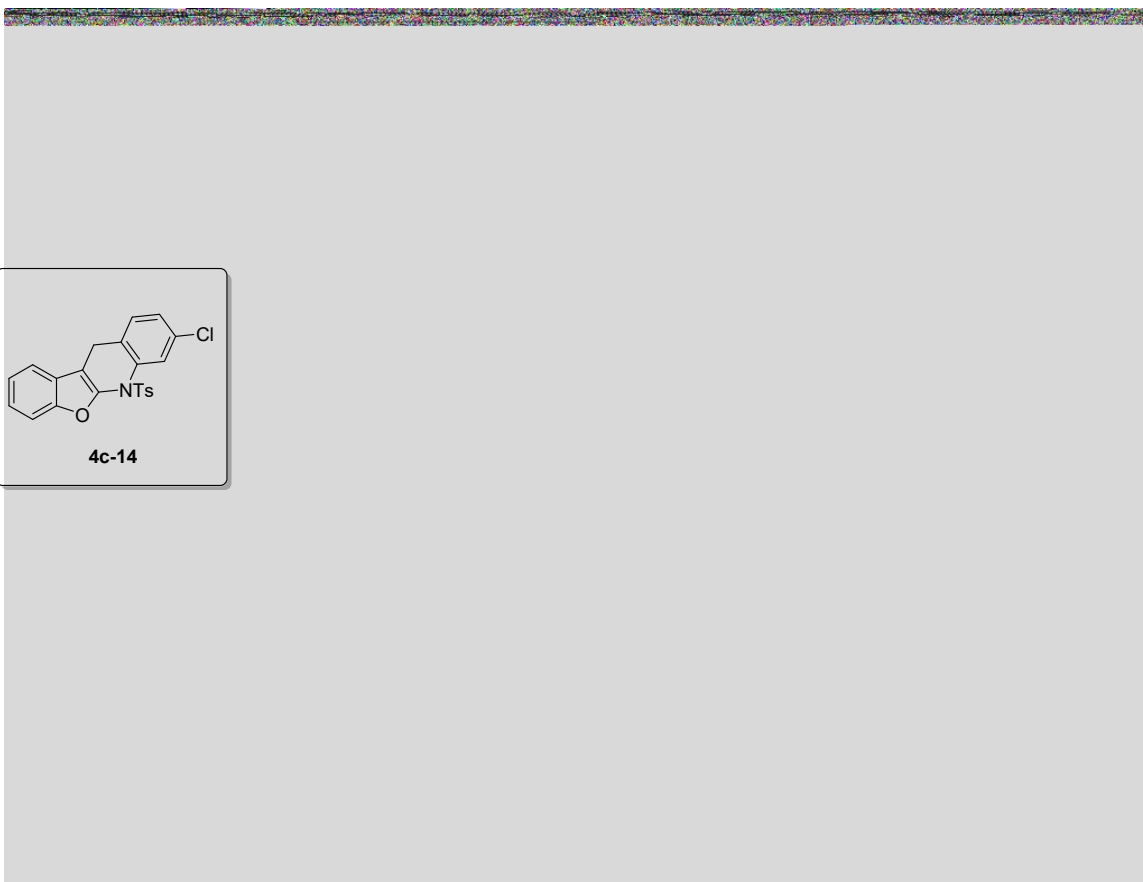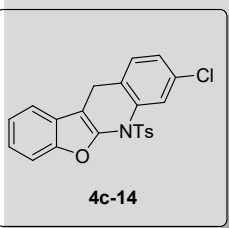

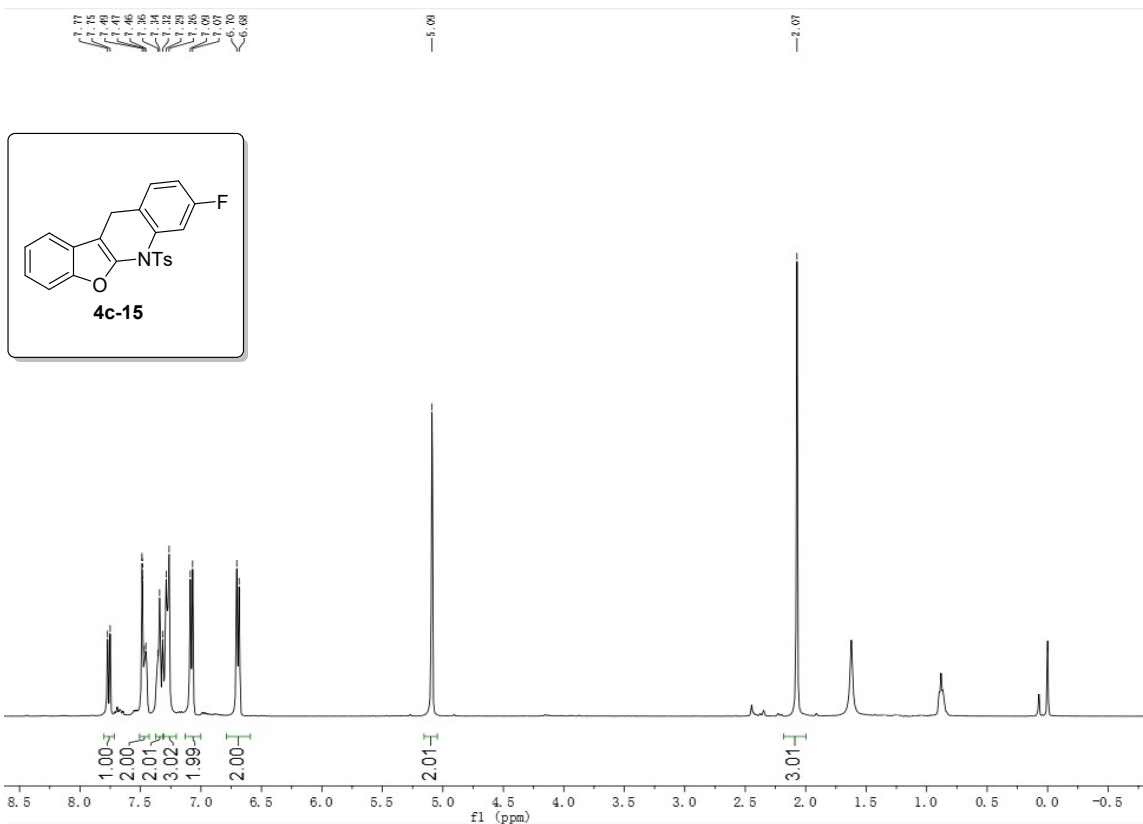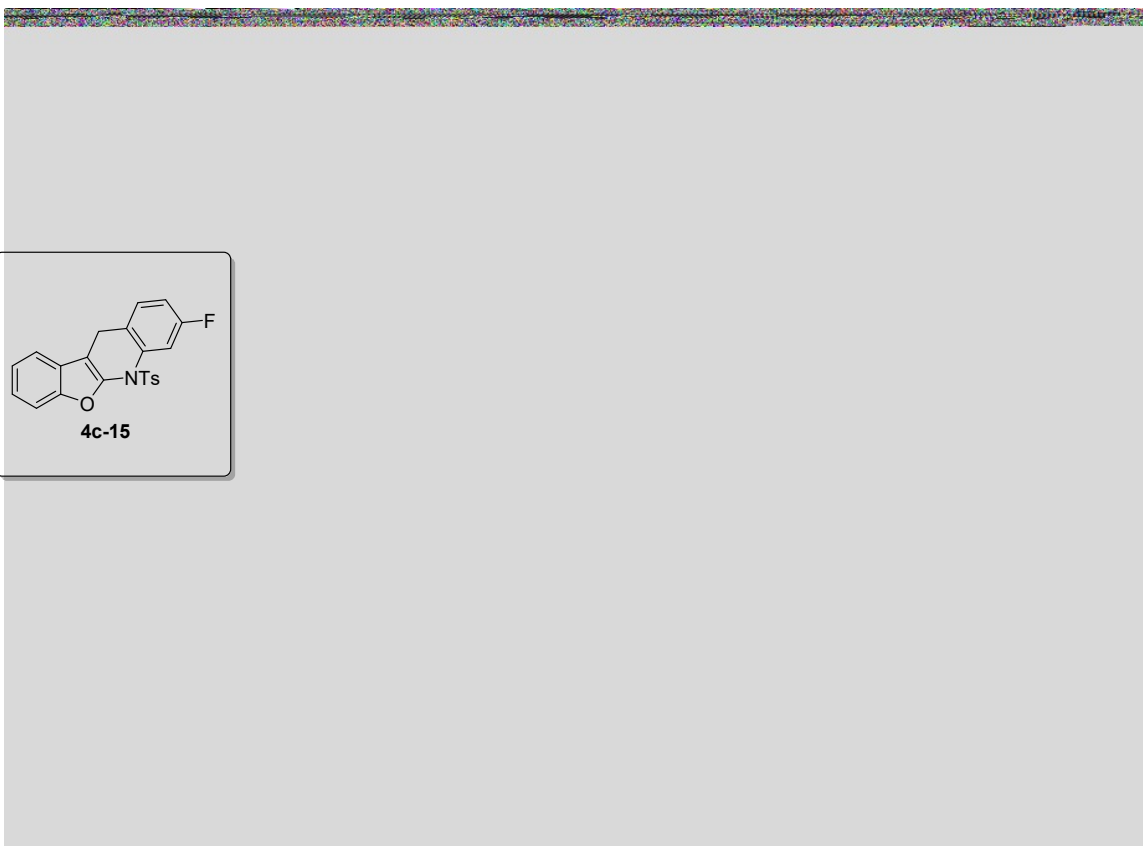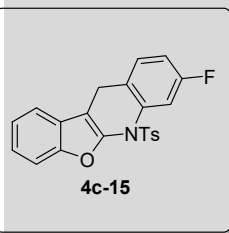

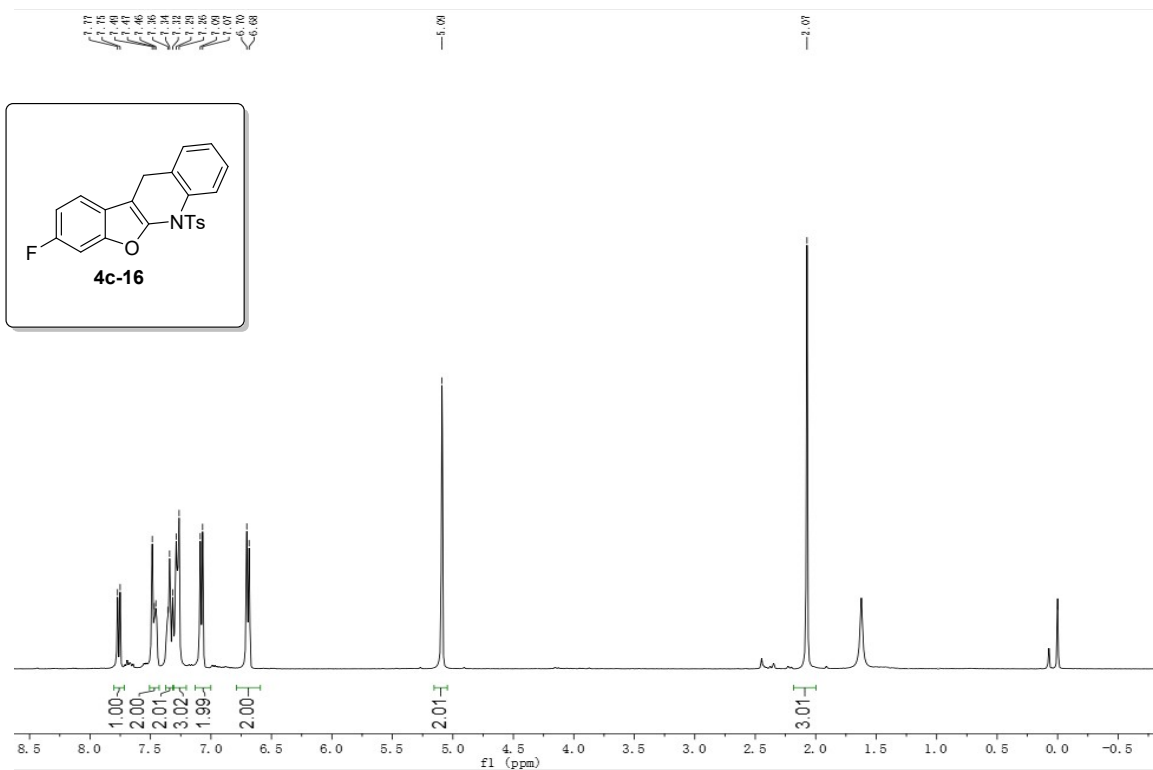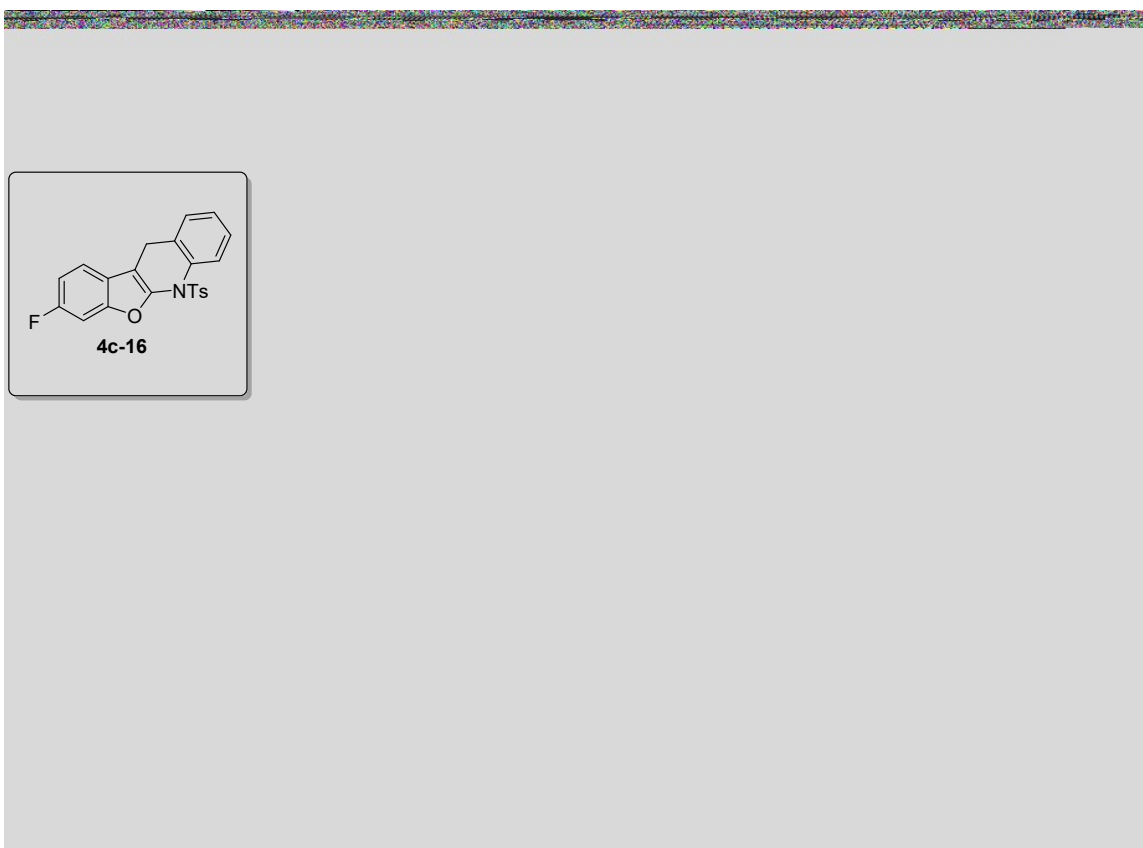

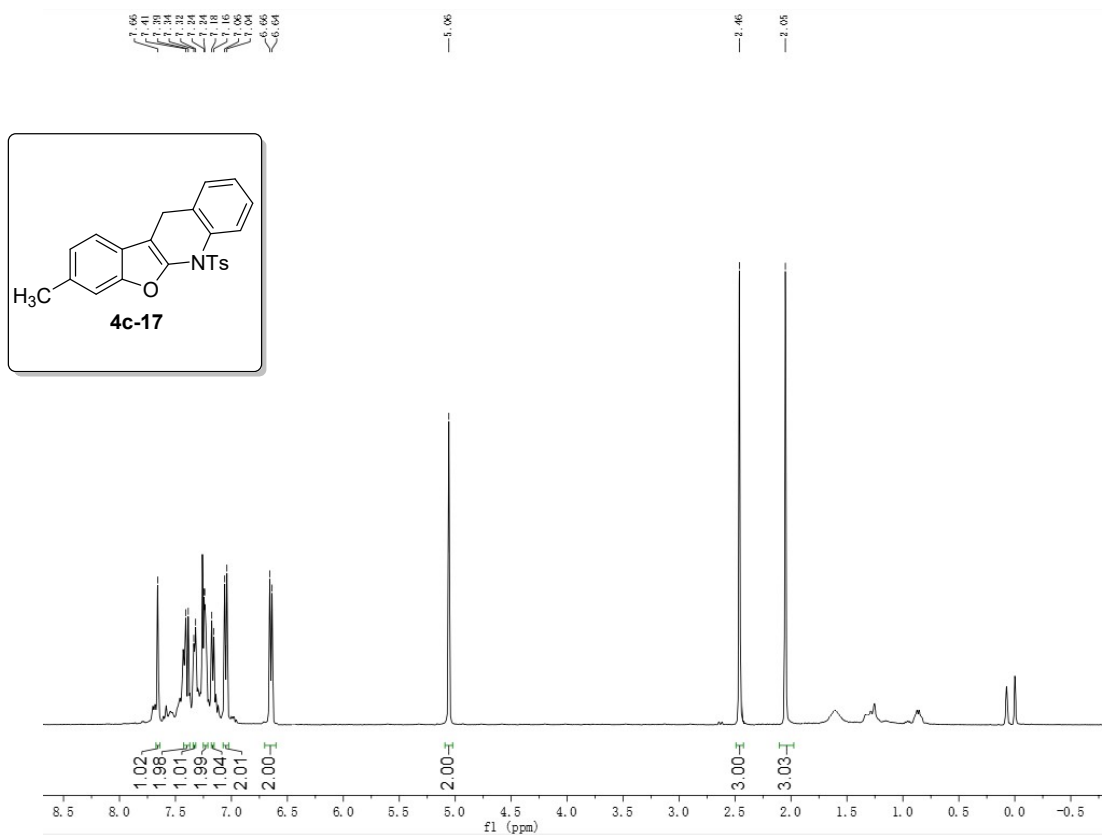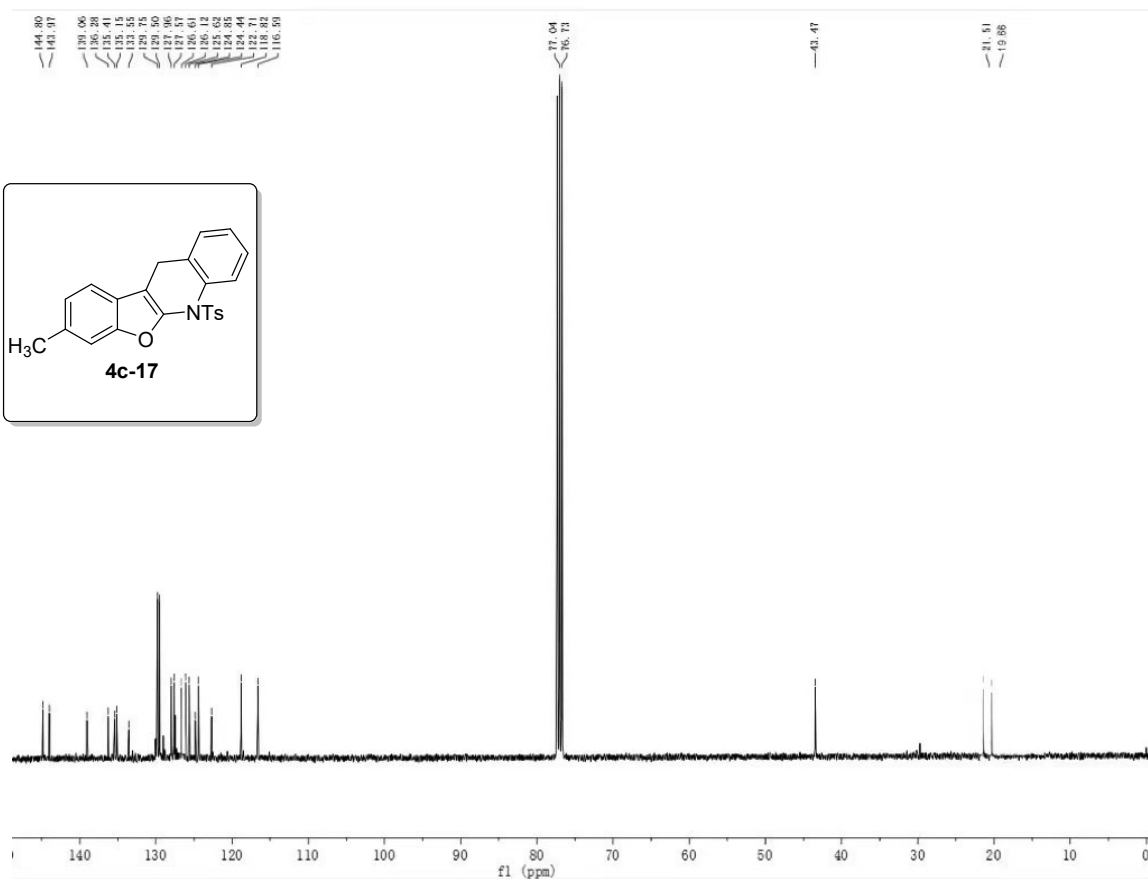

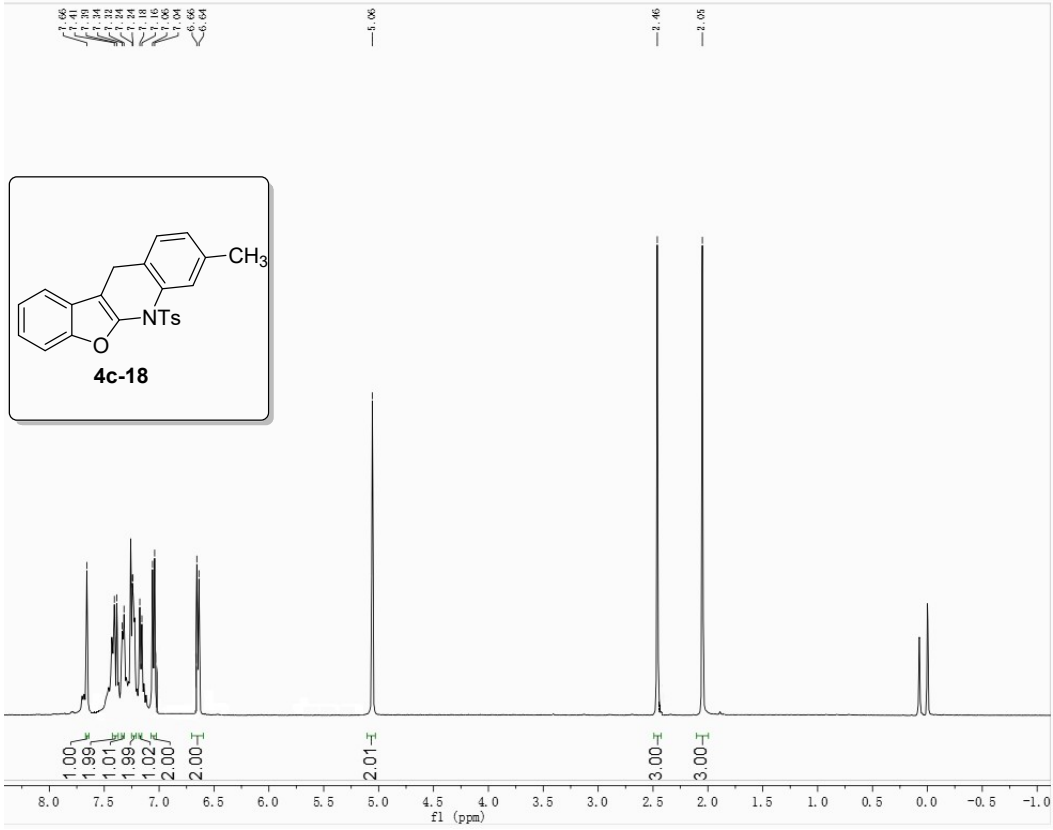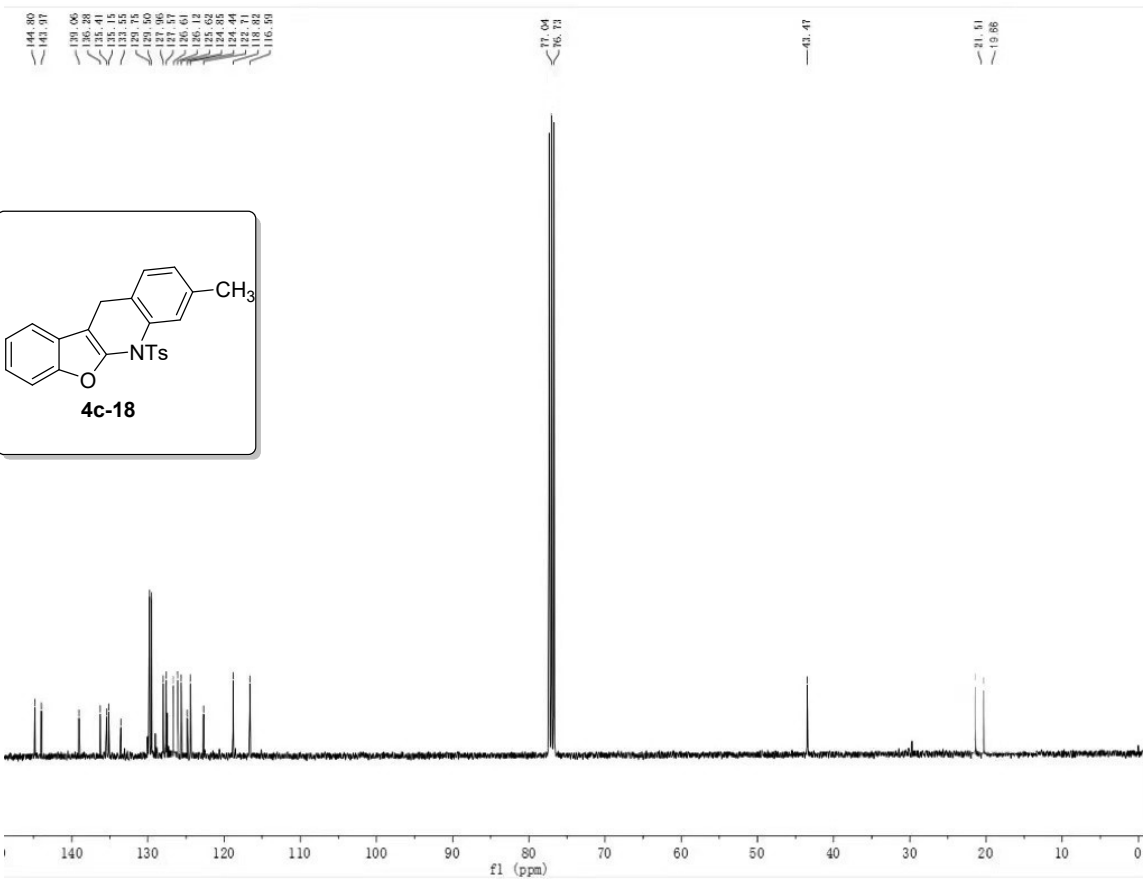

Supplement: d2ob01770a1.pdf [file d2ob01770a1.pdf]
